# A model of colour appearance based on efficient coding of natural images

Jolyon Troscianko\*<sup>1</sup> & Daniel Osorio<sup>2</sup>

<sup>1</sup>Centre for Ecology & Evolution, University of Exeter

<sup>2</sup>School of Life Sciences, University of Sussex

Corresponding author: [jt@jolyon.co.uk](mailto:jt@jolyon.co.uk)

## ORCIDs:

JT: 0000-0001-9071-2594

DO: 0000-0002-5856-527X

## **Abstract**

1 An object's colour, brightness and pattern are all influenced by its surroundings, and a number of  
2 visual phenomena and "illusions" have been discovered that highlight these often dramatic effects.  
3 Explanations for these phenomena range from low-level neural mechanisms to high-level processes  
4 that incorporate contextual information or prior knowledge. Importantly, few of these phenomena  
5 can currently be accounted for when measuring an object's perceived colour. Here we ask to what  
6 extent colour appearance is predicted by a model based on the principle of coding efficiency. The  
7 model assumes that the image is encoded by noisy spatio-chromatic filters at one octave  
8 separations, which are either circularly symmetrical or oriented. Each spatial band's lower threshold  
9 is set by the contrast sensitivity function, and the dynamic range of the band is a fixed multiple of  
10 this threshold, above which the response saturates. Filter outputs are then reweighted to give equal  
11 power in each channel for natural images. We demonstrate that the model fits human behavioural  
12 performance in psychophysics experiments, and also primate retinal ganglion responses. Next we  
13 systematically test the model's ability to qualitatively predict over 35 brightness and colour  
14 phenomena, with almost complete success. This implies that contrary to high-level processing  
15 explanations, much of colour appearance is potentially attributable to simple mechanisms evolved  
16 for efficient coding of natural images, and is a basis for modelling the vision of humans and other  
17 animals.

18

19

20 **Key words**

21 vision, visual modelling, colour appearance, visual illusions, colour constancy

22

23 **Introduction**

24 The colour and lightness of objects cannot be recovered directly from the retinal image of a scene,  
25 but depends upon neural processing by low-level spatial filters and feature detectors along with  
26 long-range and top-down mechanisms that incorporate contextual information and prior knowledge  
27 about the visual world (Wandell 1995; Brainard and Freeman 1997; Witzel et al. 2011; Bloj,  
28 Kersten, and Hurlbert 1999). Ideally, image processing achieves lightness and colour constancy –  
29 allowing us to see colour and form veridically – but inevitably it produces visual effects and  
30 illusions, which give insight into the underlying mechanisms. Thus, the surroundings of an object  
31 affect its lightness or colour in several ways. For example, assimilation and induction effects shift  
32 appearance towards that of neighbouring colours (White 1979), whereas simultaneous contrast  
33 increases the difference between an object and the surround, and in contrast induction the surround  
34 affects the contrast of a pattern (Chubb, Sperling, and Solomon 1989; Brown and MacLeod 1997).  
35 The crispening effect – where contrasts close to the background level are enhanced – encompasses  
36 all three of these phenomena (Whittle 1992; Kane and Bertalmío 2019). Related effects in colour  
37 vision include the Abney, Bezold–Brücke, Hunt, and Stevens effects, where colours, colourfulness  
38 and contrasts shift with saturation and brightness (Fairchild 2013).

39

40 Neural mechanisms have been proposed to account for some of the foregoing phenomena, for  
41 example Mach Bands can be attributed to lateral inhibition (Ratliff 1965), brightness induction to  
42 spatial filtering in the primary visual cortex (Blakeslee and McCourt 2004), and colour constancy to  
43 photoreceptor adaptation (Judd 1940; Foster 2011) or to cortical processing (Roe et al. 2012) – but  
44 these accounts are controversial, and some effects are not easily explained (Brown and MacLeod  
45 1997; Whittle 1992; Adelson 2000). Moreover, the lack of a comprehensive account of colour  
46 appearance limits the accuracy of the models that are typically used in design, industry and research  
47 (Hunt 2005a; Fairchild 2013).

48

49 Although photoreceptor adaptation and lateral inhibition do partly account for colour constancy and  
50 simultaneous contrast effects, their primary function is probably better understood as allowing the  
51 visual system to efficiently encode images of natural scenes, which have a large dynamic range and  
52 a high degree of statistical redundancy. Coding efficiency, which allows the brain to make optimal  
53 use of limited neural bandwidth and metabolic energy, is a key principle in early visual processing  
54 (Atick and Redlich 1992; Barlow 1961; Laughlin 1981; Ruderman, Cronin, and Chiao 1998;

55 Simoncelli and Olshausen 2001), and here we ask how a model based on this principle might  
56 account for colour appearance.

57

58 The optimal (maximum entropy) code for natural images, as specified by their spatial  
59 autocorrelation function (i.e. second-order image statistics), approximates a Fourier transform  
60 (Bossomaier and Snyder 1986; Baddeley et al. 1997), which is physiologically unrealistic. Efficient  
61 codes can however be defined for circularly symmetrical Difference of Gaussian (DoG) or oriented  
62 Gabor-function filters, which respectively resemble the receptive fields of retinal ganglion cells and  
63 the simple cells of mammalian visual cortex (Daugman 1985; Enroth-Cugell and Robson 1966;  
64 Marčelja 1980; Simoncelli and Olshausen 2001). In an early study, Laughlin and his co-workers  
65 (Laughlin 1981; Srinivasan et al. 1982) found that the contrast response functions and the centre-  
66 surround receptive fields of fly (*Lucilia vicina*) large monopolar cell (LMC) neurons - which are  
67 directly post synaptic to the photoreceptors - produce an efficient representation of natural images  
68 for the noise present the insect's photoreceptor responses. Specifically, synaptic amplification at the  
69 receptor to LMC synapse and lateral inhibition between receptor outputs, give a neural code that  
70 quantitatively accords with the methods of histogram equalization and predictive coding that are  
71 used by data compression algorithms (Srinivasan et al. 1982). The centre-surround receptive fields  
72 of vertebrate retinal ganglion cells are comparable to those of fly monopolar cells (Tadmor and  
73 Tolhurst 2000), while the simple cells in visual cortex generate an efficient code for natural image  
74 statistics (Field 1987; Simoncelli and Olshausen 2001).

75

76 Our aim here is not to simulate biological vision precisely, but to model efficient coding by  
77 physiologically plausible spatial filters. We describe a Spatiochromatic Bandwidth Limited (SBL)  
78 model of early vision, which uses luminance and chromatic spatial filters at octave separations to  
79 cover the detectable range of spatial frequencies (Figures 1-3). Three parameters specify the model,  
80 namely the spatial autocorrelation function (power spectrum) of natural images, noise in the retinal  
81 signal, and the channel bandwidth – or number of distinguishable response states (Figure 1;  
82 (Laughlin 1981)). The first of these parameters is given by image statistics, the second by  
83 physiological or psychophysical measurements, and the third is estimated from psychophysical data  
84 on the crispening effect (Figure 3a; (Whittle 1992)). As the model predicts colour and lightness in  
85 naturalistic images, and accounts for various visual phenomena and illusions it offers a framework  
86 for understanding neural image processing, and is a starting point for simulating colour appearance  
87 for humans and other species.

88

89

## 90 The Model

91 The SBL model is comparable to other models of early vision that have been proposed to account  
92 for lightness and colour perception. These include MIRAGE (Watt and Morgan 1985), which uses  
93 non-oriented DoG filters, and the oriented difference of gaussians model (Blakeslee and McCourt  
94 2004), which uses orientation-sensitive filters. The model differs from its predecessors in that to  
95 achieve efficient coding of natural images the gain and dynamic range (i.e. contrast response  
96 function) of neural channels vary with spatial frequency – as specified by the contrast sensitivity  
97 threshold – with gain normalised to natural scene statistics so that on average the output has equal  
98 power in each spatial channel.

99  
100 The model is implemented as follows (Figures 1,2). *i*): The image is filtered with a set of spatial  
101 filters at one octave separations. These filters are either circularly symmetrical difference of  
102 Gaussian (DoG) functions (Enroth-Cugell and Robson 1966) or Gabor functions at four orientations  
103 (Daugman 1985). The filtering process differs from convolution in that it applies a Michelson  
104 contrast to centre versus surrounds. The three spectral classes of filter correspond to those in human  
105 vision, namely achromatic/luminance with centre and surround receiving the same spectral inputs,  
106 blue – yellow, and red – green with centre and surround receiving opposite spectral inputs. *ii*): The  
107 lower threshold ( $\alpha$ ) for the filter is set by the psychophysical contrast sensitivity at the filter's centre  
108 frequency (based on contrast sensitivity functions, [CFSs], Mullen 1985; Kim, Mantiuk, and Lee  
109 2013).  $\alpha$  is subtracted from image contrasts, which is consistent with human psychophysics  
110 (Kulikowski 1976). The filters' contrast response function is linear over a limited dynamic range to  
111 an upper threshold ( $\beta$ ), which is a fixed multiple,  $\epsilon$ , of  $\alpha$ .  $\epsilon$  corresponds to the number of contrast  
112 levels that can be encoded (i.e. channel bandwidth or response states; (Laughlin 1981)); (Figures  
113 1,2). Thus, for  $\epsilon = 10$ , the contrast saturation threshold is 10 times the activation threshold for each  
114 filter. As  $\epsilon$  is equal for all channels, high sensitivity filters encode a smaller range of image  
115 contrasts than low sensitivity filters (Figure 2b). We estimated  $\epsilon$  by fitting the model to Whittle's  
116 (1992) psychophysical measurement of the crispening effect (Figure 3a, 4). *iii*) Signal power in  
117 each channel is normalised to that of the filter's response to a natural scene, thereby whitening the  
118 average spatial frequency power spectrum of the output (Carandini and Heeger 2012). *iv*) Filter  
119 outputs are summed to recover their representation of the original image, which can be compared to  
120 human perception of the image.

121

122 For the red-green and blue-yellow chromatic channels, we make the assumption, consistent with  
123 neurophysiology (Solomon and Lennie 2007; Conway 2001), that the filters are less orientation  
124 selective than for luminance channels and use only DoG filters (but see Shapley, Nunez, and

125 Gordon 2019). The bandwidth of the red-green channel equals that of the luminance DoG signal,  
126 which produces plausible results (Figure 1 and below). However, if the blue-yellow channel has the  
127 same bandwidth ( $\epsilon$ ), its low contrast sensitivity (Figure 2a) means that it fails to saturate in natural  
128 scenes. We therefore reduced  $\epsilon$  to give an equal proportion of saturated pixels in natural images for  
129 red-green and blue-yellow channels.

130

131 An implementation of the SBL model is provided as supplementary material for use with ImageJ, a  
132 free, open-source image processing platform (Schneider, Rasband, and Eliceiri 2012) and the  
133 micaToolbox (Troscianko and Stevens 2015; Berg, Troscianko, et al. 2020).

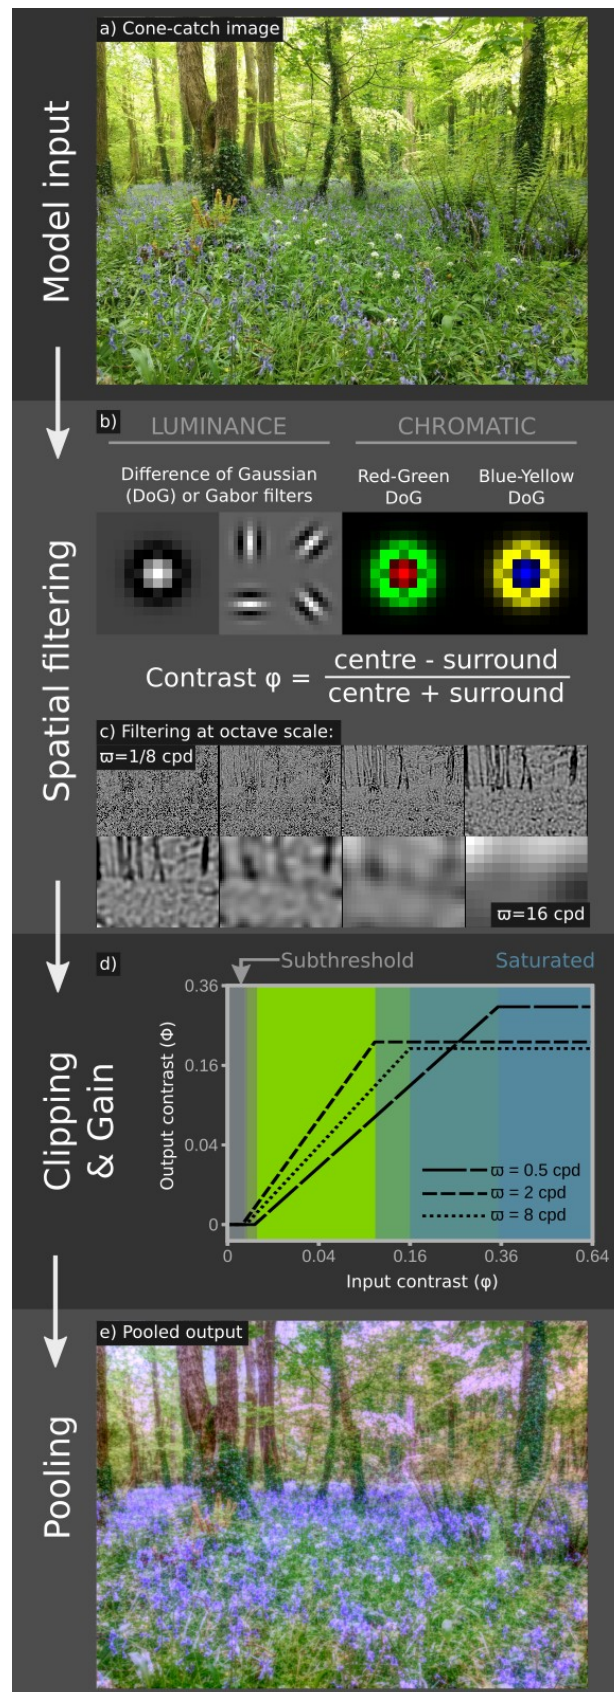

134

135 **Figure 1.** Overview of the Spatiochromatic Bandwidth Limited (SBL) model. The model uses a cone-catch image (a,  
136 Appendix), which is filtered by either DoG or Gabor kernels for luminance channels, and DoG kernels for chromatic  
137 channels (b). Contrasts are converted to Michelson contrasts (c. showing luminance DoG outputs), then clipping and  
138 gain processes are applied (d. Figure 2), and the spatial filters are pooled to create the output (e). Output colours are not  
139 scaled to sRGB space.

140

141

142

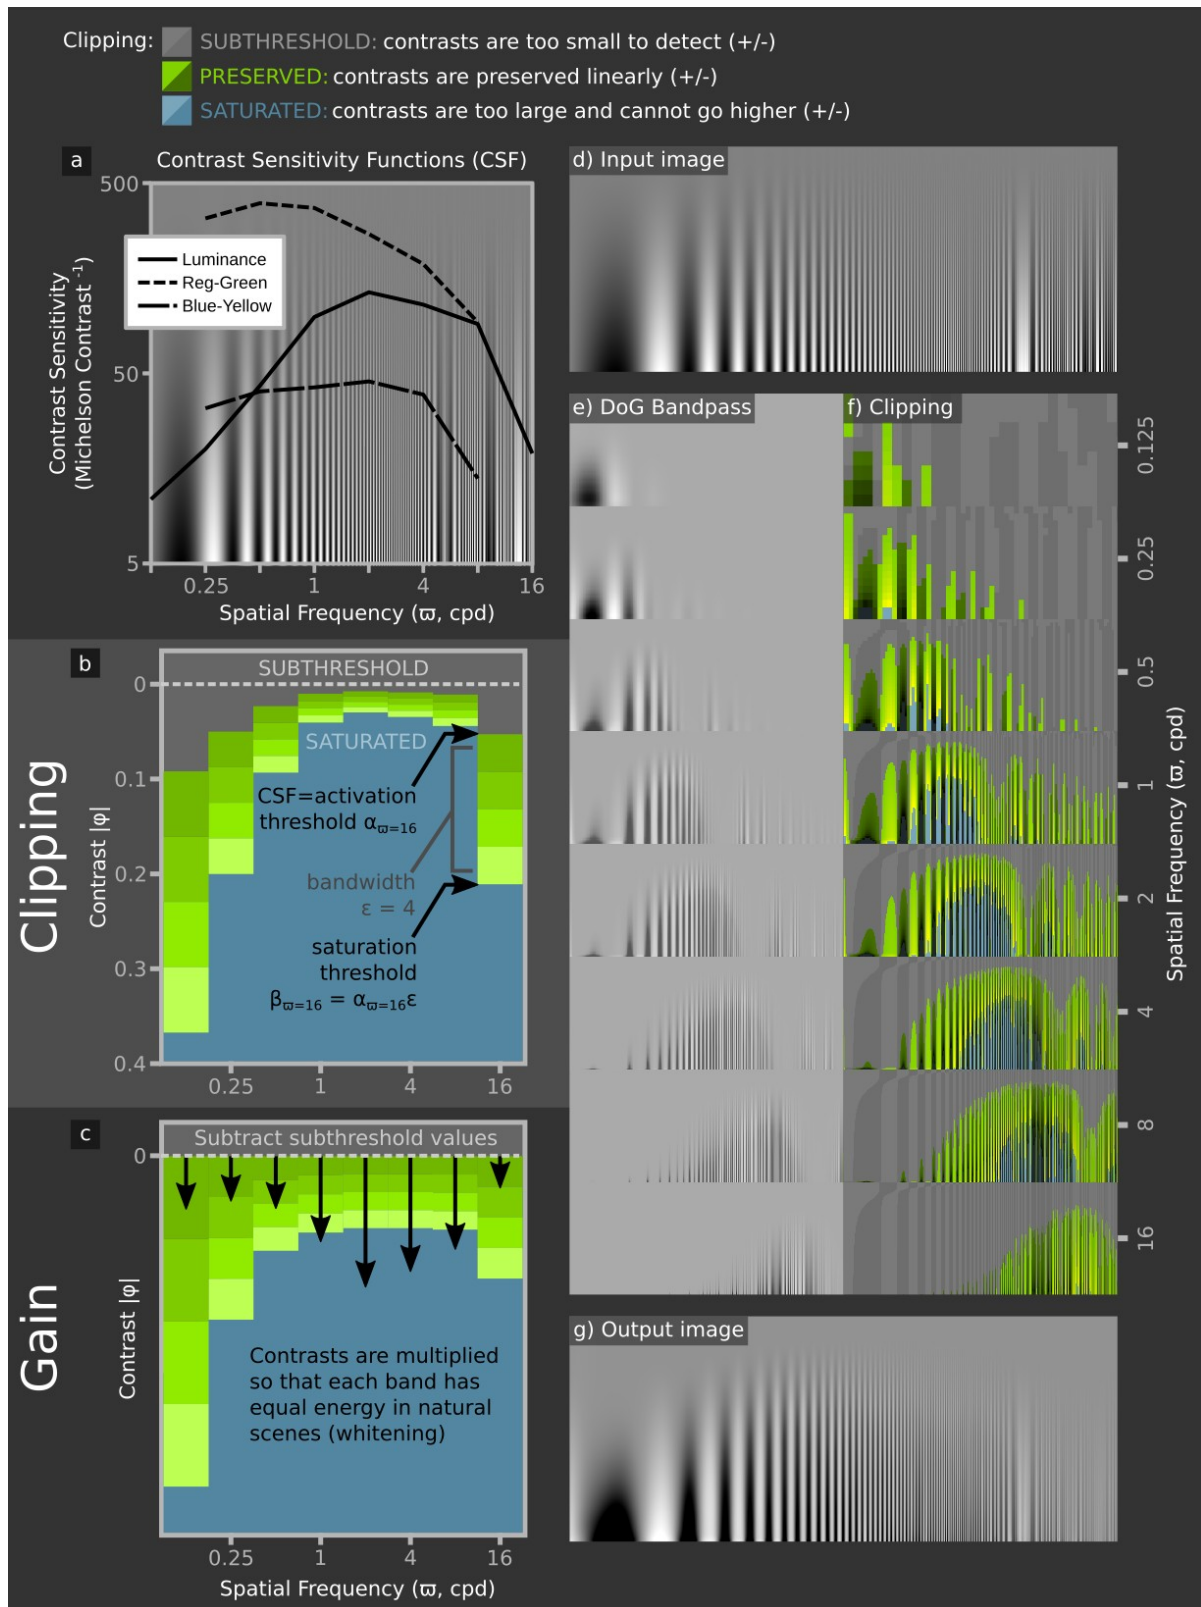

143

144

145

146

**Figure 2.** Dynamic range clipping and gain adjustment by the SBF model. a) human luminance and chromatic detection thresholds for sinewave gratings (Kim, Mantiuk, and Lee 2013). b) Clipping adjusts contrasts so that they cannot fall below the CSF at each spatial frequency ( $\alpha$ , SUBTHRESHOLD), or above the saturation threshold ( $\beta$ , SATURATED).

147 Subthreshold contrasts are subtracted, and signals at each spatial frequency are multiplied by a gain value - denoted by  
148 arrow length in (c) - so that on average natural images have equal power at each spatial frequency (whitening). The  
149 saturation threshold is calculated from the CSF and channel bandwidth,  $\epsilon$  (4 in this example) at each spatial frequency.  
150 High and low spatial frequency channels therefore have low contrast sensitivity, but encode a large range of image  
151 contrasts, whereas intermediate spatial frequencies have high sensitivity and a low dynamic range. To demonstrate the  
152 clipping effects, we show an input image with sinewaves of different spatial frequencies and contrasts (d). (e) shows  
153 bandpass spatial filters and (f) highlights regions that are clipped or preserved. The overlap between neighbouring  
154 octaves (f) means that where contrasts are saturated for one channel, they are unlikely to be saturated for all  
155 neighbouring channels so that contrast differences are detectable even in high contrast scenes. Note that the fine lines in  
156 these illustrative images suffer from moiré effects when viewed on a monitor.

157

### 158 Estimation of the bandwidth, $\epsilon$

159 Channel bandwidth ( $\epsilon$ ) is estimated by fitting the model to human psychophysical data from  
160 Whittle's (Whittle 1992) investigation of the crispening effect. This study described how perceived  
161 lightness varies with luminance, and how contrast sensitivity depends on contrast and background  
162 luminance, by asking subjects to adjust target luminances to make equal-interval brightness series  
163 (Figures 3a, 4a). We created images simulating the viewing conditions in Whittle's experiment,  
164 including the spatial arrangement and luminance of the grey patches that he used to create  
165 perceptually uniform equal-contrast steps. Raw data (Figure 3a) were extracted from figures using  
166 WebPlotDigitiser (Rohatgi 2020). Based on least squares fitting,  $\epsilon$  is 15 for the circularly  
167 symmetrical version of the SBF model (DoG,  $R^2 = 0.994$ ), and 3.75 for the oriented version of the  
168 model (Gabor,  $R^2 = 0.995$ ). These bandwidths are within the range encoded by single neurones  
169 (Baddeley et al. 1997; Laughlin 1981). Critically, the model recreates the characteristic inflection  
170 point around the background grey value. Lowering the bandwidth, and thereby increasing the  
171 proportion of saturated channels, produces a more extreme crispening effect, which suggests that  
172 crispening is due to saturation rather than to loss of contrast sensitivity with increasing contrast  
173 between targets and the background (Figure 2), which is the usual interpretation of Fechner's law  
174 (Whittle 1992).

175

176 Interestingly, the model with  $\epsilon$  derived from Whittle's (1992) crispening data accurately predicts the  
177 responses of primate retinal ganglion cells to sinewave gratings (Derrington and Lennie 1984)  
178 (Figure 3b). The model fit ( $R^2 = 0.972$ ) is better than the authors' own function ( $R^2 = 0.952$ ). Both  
179 the psychophysical crispening effect and bottom-up neural responses suggest that at around 4 cpd  
180 the saturation threshold for the human vision and macaque retinal ganglion cells ( $\beta_{\omega=4}$ ) is  
181 approximately 0.2.

182



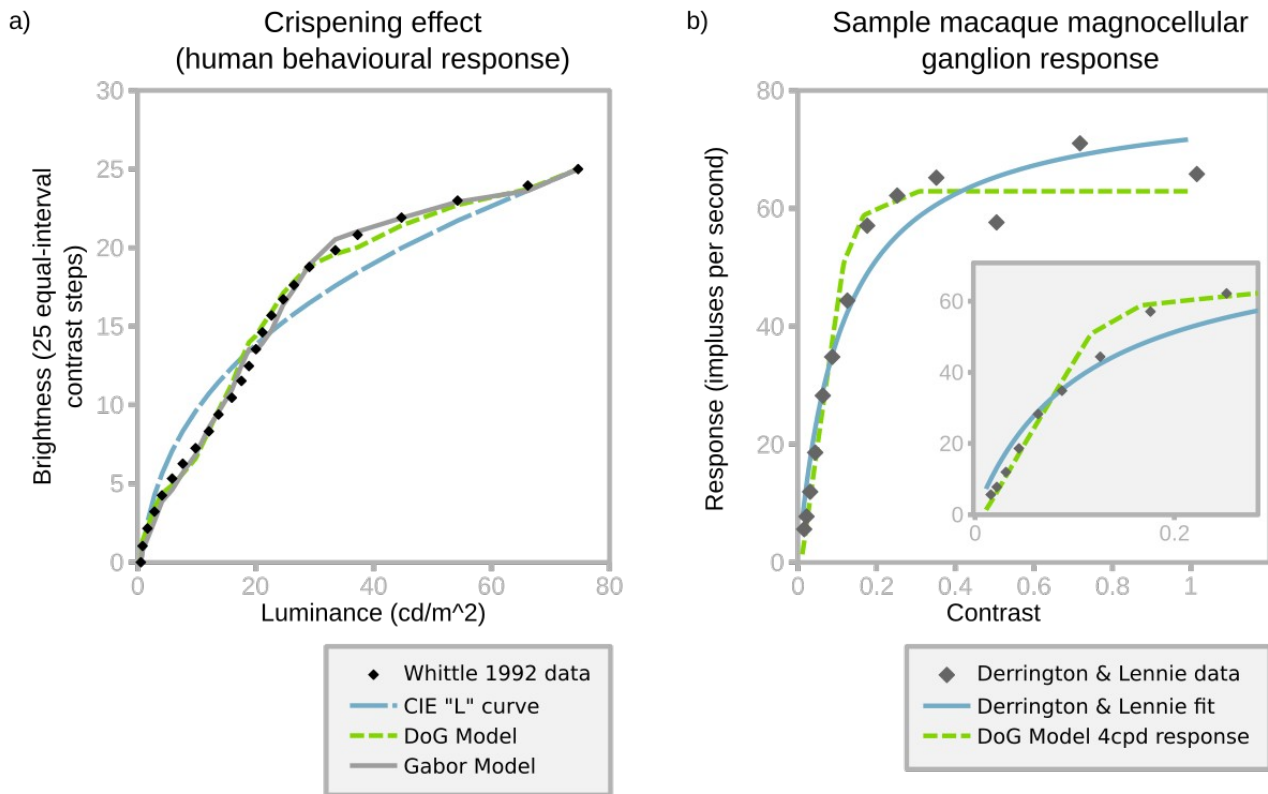

183

184 **Figure 3.** Fitting the SBL model to behavioural and neurophysiological data. a) fit to Whittle’s crispensing data (1992,  
 185 figure 9, “25/inc-dec/gray” treatment). Model output is scaled to the same 0 – 25 range. The best-fitting bandwidth ( $\epsilon$ )  
 186 for DoG filters is 15, and for Gabor (oriented) filters is 3.75, both of which result in a good fit to the raw data. The CIE  
 187  $L^*$  fit specifies lightness in psychophysics and does not account for contrast (Commission Internationale de l’Eclairage  
 188 1978). b) Model fit to single ganglion response data from Derrington and Lennie (1989, figure 11b). Fitting used a  
 189 single free parameter that multiplied the arbitrary SBL model output to match neural firing responses (with zero  
 190 intercept) by least-squares regression. The SBL model shows a linear contrast response and saturation point that provide  
 191 a better fit than the authors’ model. The inset excludes the three highest contrast values to highlight the linear  
 192 relationship prior to saturation.

193

### 194 Model Performance

195 We tested the SBL model’s ability to account for approximately thirty-seven perceptual phenomena  
 196 that could plausibly be explained by low-level visual mechanisms (Adelson 2000; Shapiro and  
 197 Todorovic 2016; Bertalmío et al. 2020), first for the version with oriented luminance filters, and  
 198 secondarily for DoG filters (chromatic filters were always non-oriented, see above). Both versions  
 199 of the model qualitatively predict almost all effects and, where relevant, their controls (Table 1,  
 200 Figure 4 and Appendix). The only exceptions were the DoG (non-oriented) model’s inability to  
 201 predict illusory spots and bars in the Hermann grid and Poggendorff illusions, comparatively weak  
 202 performance with one control for the Chevreul staircase, and the enhanced assimilation of colour  
 203 created by bars in patterned chromatic backgrounds (Monnier and Shevell 2003). Nevertheless, this  
 204 performance was achieved with no free parameters (Figures 1-3), and the model can be adjusted to  
 205 predict all effects.

| Phenomenon                                                                    | Key                                   |                                                         |
|-------------------------------------------------------------------------------|---------------------------------------|---------------------------------------------------------|
|                                                                               | Predicts effect and relevant controls | Partially predicts effect, or does not predict controls |
|                                                                               | DoG model                             | Gabor Mode                                              |
| Crispensing effect                                                            |                                       |                                                         |
| Contrast sensitivity                                                          |                                       |                                                         |
| Brightness induction/assimilation (e.g. White illusions)                      |                                       |                                                         |
| Simultaneous brightness contrast                                              |                                       |                                                         |
| Illusory bars and spots (e.g. Hermann grid, Poggendorff illusion)             |                                       |                                                         |
| Contrast induction for spatial frequency, orientation, and chromatic contrast |                                       |                                                         |
| Colour constancy/chromatic adaptation                                         |                                       |                                                         |
| Chromatic simultaneous contrast                                               |                                       |                                                         |
| Chromatic assimilation                                                        |                                       |                                                         |

206

207 **Table 1.** Summary of phenomena tested with oriented and non-oriented versions of the SBL model, with the  
 208 parameters,  $\alpha$ ,  $\beta$  and  $\epsilon$  fixed as explained in the text. All phenomena were qualitatively explained to some degree. For  
 209 illustrations of specific effects see the supplementary appendix.

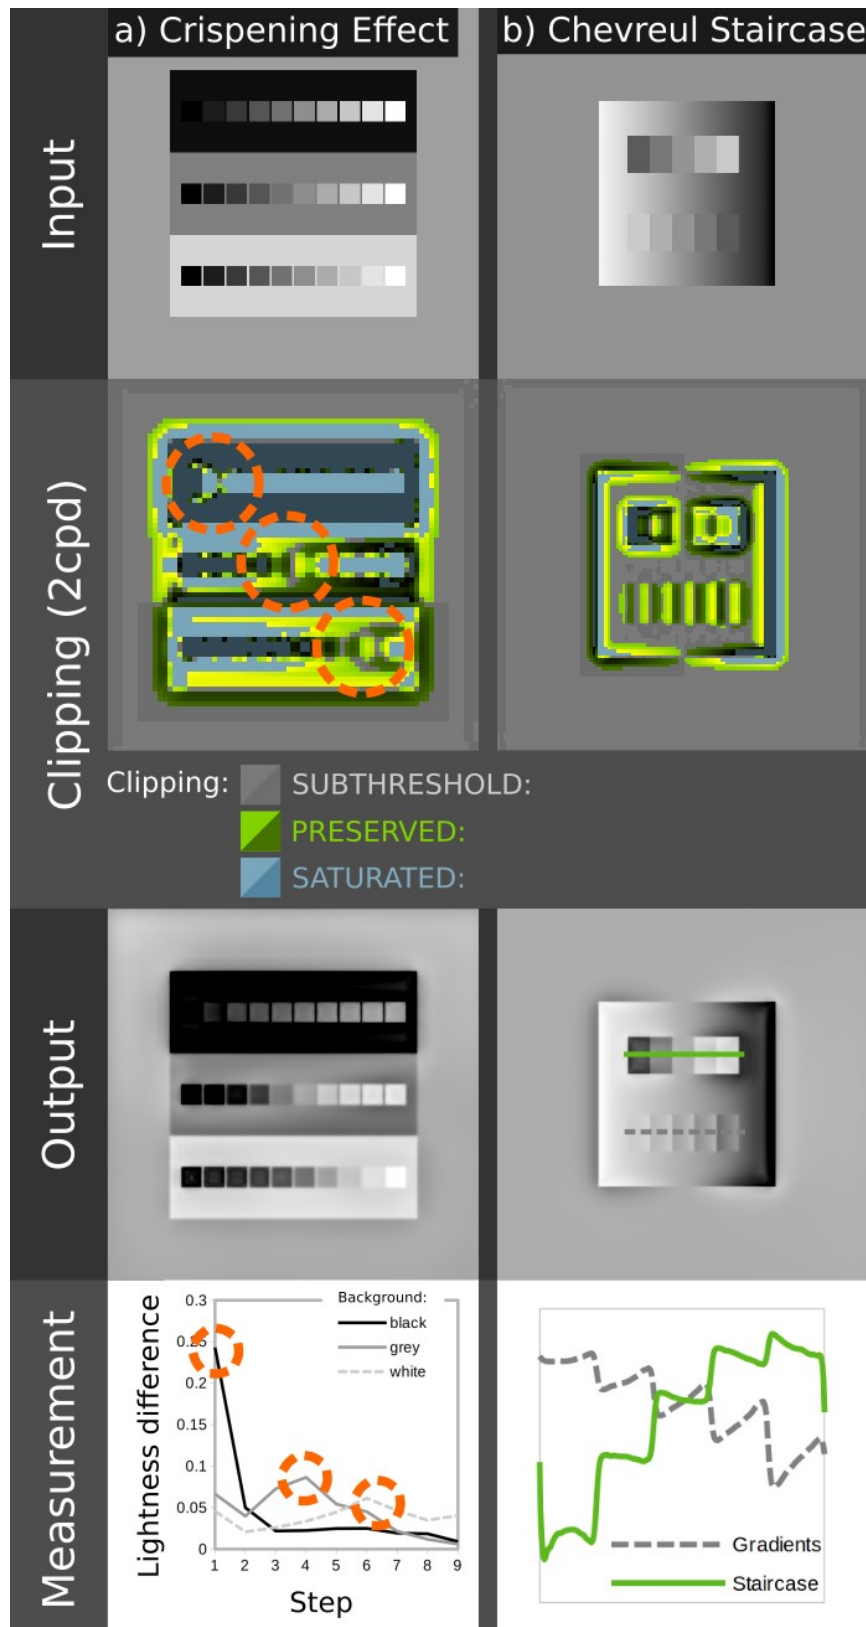

210

211 **Figure 4.** Illustration of dynamic range clipping by the SBL model. (a) for the crispensing effect (Whittle 1992). The  
 212 three rows of grey levels are identical, with equal step sizes. Against the black background contrasts appear largest for  
 213 darker squares, whereas the opposite is true for the white background. The SBL model explains this effect through  
 214 saturation; contrasts near the grey level of the local surroundings are preserved (highlighted with circles), while other  
 215 contrasts are saturated (blue areas adjacent to the highlighted areas). The graph at the bottom plots differences between  
 216 squares in the three rows, showing higher contrasts for dark, middle and light ranges respectively. Illusions such as the

217 Chevreul staircase (b) are also explained in part by clipping. The upper staircase appears to be a series of square steps in  
218 grey level. The lower staircase has the same grey levels, but is flipped so that its gradient matches the surround gradient.  
219 The SBL model correctly predicts that the upper staircase is seen as square steps in grey level (solid green line) while  
220 the lower staircase is a series of gradients (dashed grey line). The plot shows pixel values in arbitrary units measured  
221 along each staircase, as highlighted in the output image. The model shows that this effect arises partly because the  
222 matched gradients of the lower staircase causes local subthreshold contrasts, and because contrasts are not balanced on  
223 each side of the step.

224

## 225 **Discussion**

226 The Spatiochromatic Bandwidth Limited model of colour appearance described here at least  
227 qualitatively predicts the appearance of a wide variety of images that are used to demonstrate colour  
228 and lightness perception (Table 1, Figure 4, Appendix). These include ‘illusions’ that have been  
229 explained by high-level interpretations of 3D geometry, lighting, atmospheric, or mid-level  
230 principles of perceptual organisation (Adelson 1993; Gilchrist 2014): for example White-Munker,  
231 shadow, Koffka ring and haze illusions. It is therefore parsimonious to suggest that many aspects of  
232 object appearance can be attributed to mechanisms adapted for – or consistent with – coding  
233 efficiency (Barlow 1961). Other accounts of the same phenomena invoke specialised mechanisms  
234 (e.g. Land and McCann 1971; Blakeslee and McCourt 2004) or top-down effects, which imply that  
235 multiple sources of sensory evidence and prior knowledge are used to infer the most likely cause of  
236 the stimulus (Brown and MacLeod 1997; Gregory 1997; Yuille and Kersten 2006; Adelson 2000).  
237 Neither does the SBL model invoke light adaptation or eye movements, which implies that colour  
238 constancy is largely independent of the adaptation state of the photoreceptors – provided that they  
239 are not saturated. By comparison the models used by standard colour spaces, such as CIE LAB/CIE  
240 CAM implement the von Kries co-efficient rule (Foster 2011), which assumes that photoreceptor  
241 responses are adapted to the global mean for a scene, even though chromatic adaptation is affected  
242 by both local and global colour contrasts (Kraft and Brainard 1999). Retinex (Land and McCann  
243 1971) and Hunt models do normalise receptor signals to their local value (Hunt 2005a) but the  
244 weightings of global and local factors are poorly understood and the underlying mechanism is  
245 unclear (Kraft and Brainard 1999). Moreover, the adjustments required for colour constancy are  
246 largely complete within about 25ms (Rinner and Gegenfurtner 2000), which is too fast for receptor  
247 adaptation, but consistent with the purely feed-forward character of the SBL model. Figure 5 shows  
248 how the SBL model can account for colour appearance in a naturalistic image under variable  
249 illumination. More generally, the feed-forward architecture of the SBL model explains why many  
250 other visual phenomena appear without any delay, whereas existing models require feedback loops  
251 for normalisation (Land and McCann 1971; Hunt 2005a; Blakeslee and McCourt 2004). Thus,  
252 Brown and MacLeod (Brown and MacLeod 1997) comment that the distribution of surround

253 colours affects colour appearance almost immediately, leaving little time for feedback or adaptation.  
254 Likewise, as suggested by (Chubb, Sperling, and Solomon 1989), contrast induction is explained  
255 without requiring the feedback invoked by (Nassi, Lomber, and Born 2013). This is because,  
256 according to the SBL model, low contrast surrounds allow all spatial bands to operate within their  
257 dynamic ranges, whereas high contrast surrounds saturate some spatial bands, resulting in under-  
258 estimates of brightness contrast or chromaticity (Figures 3a, 4). The model also reconciles contrast  
259 constancy with a visual system that varies dramatically in contrast sensitivity and contrast gain  
260 across spatial frequencies, allowing suprathreshold contrasts to have a similar appearance at  
261 different distances (Georgeson and Sullivan 1975). Contrasts are predicted to be most constant  
262 where they are saturated across multiple spatial frequencies, e.g. where the blue regions in Figure 2f  
263 overlap. Pooling across spatial scales might explain the Abney effect, which is a shift in hue that  
264 occurs when white light is added to a monochromatic stimulus (Burns et al. 1984), because the  
265 colour stimulus may be below-threshold at some spatial bands, but above threshold for others, but  
266 we require specific data to estimate the bandwidth of chromatic channels (equivalent to Whittle's  
267 (1992) luminance crispening data). As noted above (Model, Figures 1, 2a), we assume that the  
268 bandwidth of the red-green signal equals the luminance DoG signal, but the blue-yellow signal has  
269 reduced the bandwidth, which produces plausible results when processing natural scenes, but future  
270 work should measure the chromatic bandwidth functions and determine whether the SBL model can  
271 account for the Abney effect quantitatively. Further developments of the chromatic SBL model  
272 should also investigate whether performance could be improved by modelling both single-opponent  
273 and double-opponent pathways. The latter are sensitive to both spatial frequency and orientation,  
274 and has been suggested to play a role in suprathreshold colour appearance (Shapley, Nunez, and  
275 Gordon 2019). However, we were able to simulate the same spatial-frequency/saturation effects  
276 with the non-oriented version of the SBL model (Appendix).

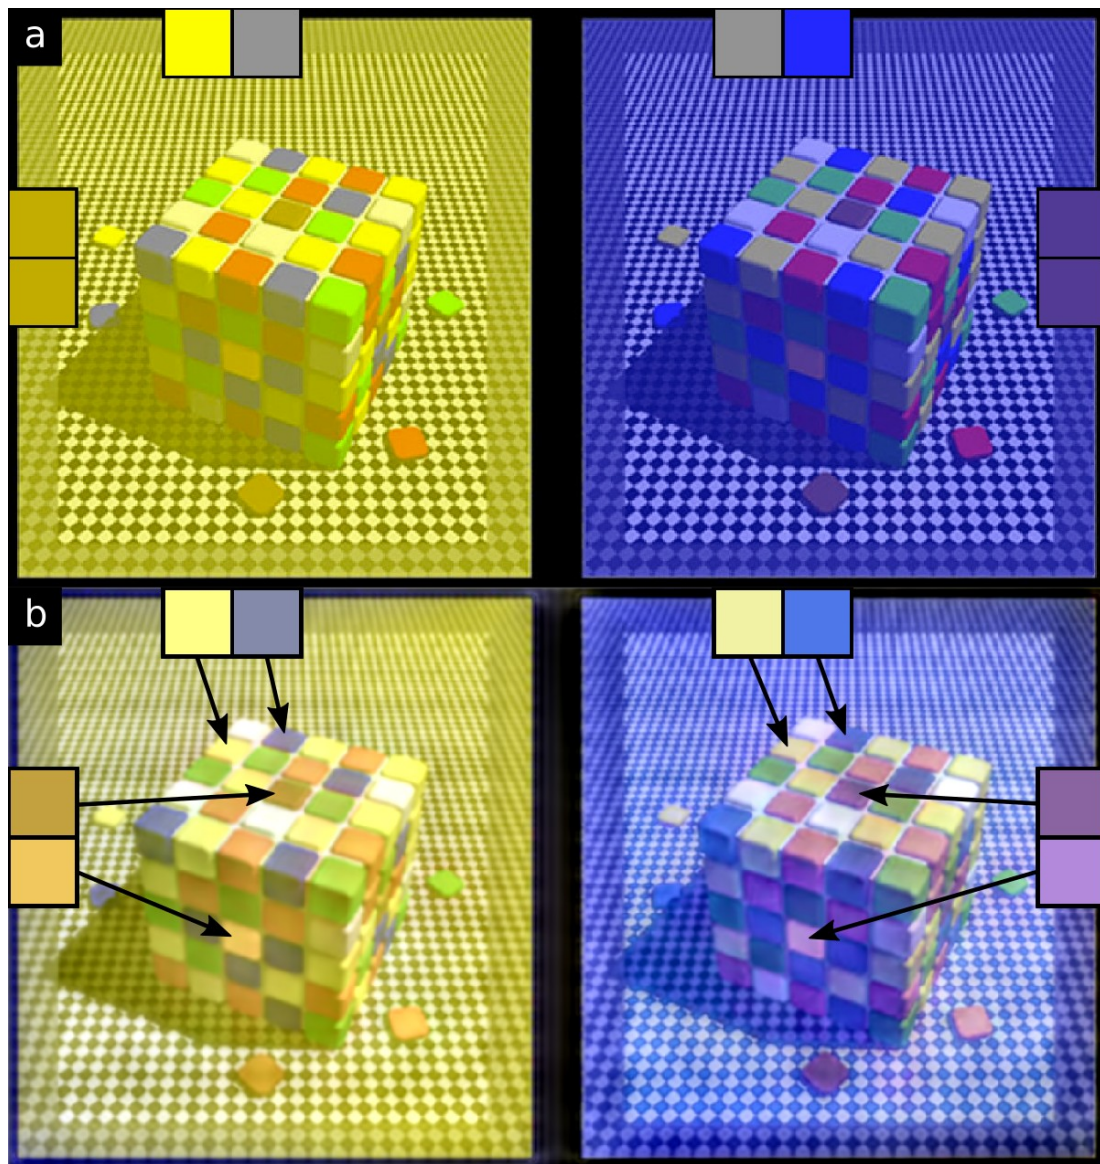

277

278 **Figure 5.** The SBL model can account for colour appearance in complex naturalistic images. (a) shows the input image  
279 (from Purves, Lotto, and Nundy 2002/Wikimedia) where the blue squares on the yellow-tinted side (left) and the yellow  
280 squares on the blue-tinted side (right) are physically the same grey (colours are shown in the squares at the top of the  
281 image). The SBL model (b) correctly predicts that the squares under both tinting regimes appear yellow and blue, rather  
282 than grey. The SBL model also predicts the powerful simultaneous contrast (or shadow) illusion present in this image  
283 whereby; the central tiles on top of the cube appear to be darker than the central tiles on the shaded side of the cube  
284 (colours shown in squares on the far left and for right hand sides).

285

### 286 *The Circularly Symmetric Version of the SBL Model and Animal Vision*

287 Whereas the oriented version of the SBL model uses orientation selective achromatic filters and  
288 circularly symmetrical chromatic filters (see above), the circularly symmetrical version uses DoG  
289 filters for all channels. For the visual phenomena that we have tested the oriented version of the  
290 SBL model predicts lightness and colour at least as well as the circularly symmetrical version (table  
291 1). It might therefore seem logical to consider only the former, but visual systems of all animals  
292 probably have circularly symmetrical receptive fields [e.g. (Srinivasan et al. 1982)], but there is

293 limited evidence for orientation selective cells other than in mammalian visual cortex. Also, the  
294 differences between the two versions of the SBL model seem to us to be surprisingly small. For  
295 example, both predict White effects, which might be expected to depend on orientation selective  
296 mechanisms (supplementary appendix; Blakeslee and McCourt 2004; Bertalmio et al. 2020), but  
297 only the oriented model correctly predicts the presence of illusory spots in the Hermann grid, and  
298 elimination of these spots in the wavy grid (Geier et al. 2008). Similarly, the oriented version of the  
299 model predicts Koffka rings and the Chevreul staircase (Figure 4b) more accurately than the  
300 circularly symmetrical version. The bandwidth,  $\epsilon$ , for the non-oriented filter is approximately 15,  
301 which matches neurophysiological measurements from primate retinal ganglion cells (Figure 3;  
302 Derrington and Lennie 1984). By comparison the bandwidth of the oriented version is estimated to  
303 be about four-fold lower than that of the non-oriented model, which is consistent with the low spike  
304 rates of neurons in the primary visual cortex (Baddeley et al. 1997). For a given spike rate  
305 partitioning the information into multiple channels allows a correspondingly reduced integration  
306 time.

307

308 The SBL model is useful for non-human animals because coding efficiency is a universal principle,  
309 and contrast sensitivity functions are known for many species [Figure 2a; (Caves and Johnsen  
310 2018)], whereas psychophysical and neurophysiological data on visual mechanisms in non-primates  
311 is limited. Current research into non-human colour appearance typically uses the receptor noise  
312 limited (RNL) model (Vorobyev and Osorio 1998; Renoult, Kelber, and Schaefer 2017), which also  
313 assumes that early vision is constrained by low level noise. Others have sought to control for acuity  
314 and distance dependent effects (Caves and Johnsen 2018; Berg, Troscianko, et al. 2020; Barnett et  
315 al. 2018), but surprisingly few studies have utilised contrast sensitivity functions (Melin et al.  
316 2016), and behavioural validation of the models is difficult (Silvasti, Valkonen, and Nokelainen  
317 2021; Berg, Hollenkamp, et al. 2020). As with human vision, the SBL model may reconcile a  
318 number of key effects. For example, in a bird (blue tit, *Cyanistes caeruleus*) chromatic  
319 discrimination thresholds depended on the contrast of the surround (Silvasti, Valkonen, and  
320 Nokelainen 2021), which resembles chromatic contrast induction (Brown and MacLeod 1997) and  
321 is simulated by the SBL model. Shadow-illusion effects have also been demonstrated in fish  
322 (Simpson, Marshall, and Cheney 2016). Aside from predicting colour appearance the SBL model  
323 highlights comparatively unexplored trade-offs in visual systems, with contrast sensitivity  
324 potentially linked to dynamic range and to other factors such as low-light vision and temporal  
325 acuity. For example, birds have poor luminance contrast sensitivity, but high temporal acuity  
326 consistent with a low neural bandwidth in the SBL model (Potier, Mitkus, and Kelber 2018; Ghim  
327 and Hodos 2006; Boström et al. 2016).

## Acknowledgements:

We thank Jenny Bosten, Nick Scott-Samuel and Roland Baddeley for their constructive feedback.

## Funding:

JT was funded by a NERC IRF (NE/P018084/1)

## Contributions

JT conceived and developed the initial model, and performed the coding and testing; DO contributed to further model development and testing. Both authors wrote the manuscript.

## Competing Interest Statement

We have no competing interests.

## References

- Adelson, Edward H. 1993. 'Perceptual Organization and the Judgment of Brightness'. *Science* 262 (5142): 2042–44.
- . 2000. 'Lightness Perception and Lightness Illusions'. In *The New Cognitive Neurosciences*, 2nd ed. MIT Press, Cambridge, MA.
- Atick, Joseph J., and A. Norman Redlich. 1992. 'What Does the Retina Know about Natural Scenes?' *Neural Computation* 4 (2): 196–210.
- Baddeley, Roland, L. F. Abbott, Michael C. A. Booth, Frank Sengpiel, Tobe Freeman, Edward A. Wakeman, and Edmund T. Rolls. 1997. 'Responses of Neurons in Primary and Inferior Temporal Visual Cortices to Natural Scenes'. *Proceedings of the Royal Society of London. Series B: Biological Sciences* 264 (1389): 1775–83. <https://doi.org/10.1098/rspb.1997.0246>.
- Barlow, Horace B. 1961. 'Possible Principles Underlying the Transformation of Sensory Messages'. *Sensory Communication* 1 (01).
- Barnett, James B., Constantine Michalis, Nicholas E. Scott-Samuel, and Innes C. Cuthill. 2018. 'Distance-Dependent Defensive Coloration in the Poison Frog *Dendrobates Tinctorius*, Dendrobatidae'. *Proceedings of the National Academy of Sciences*, May, 201800826. <https://doi.org/10.1073/pnas.1800826115>.
- Berg, Cedric P. van den, Michelle Hollenkamp, Laurie J. Mitchell, Erin J. Watson, Naomi F. Green, N. Justin Marshall, and Karen L. Cheney. 2020. 'More than Noise: Context-Dependent Luminance Contrast Discrimination in a Coral Reef Fish (*Rhinecanthus Aculeatus*)'. *Journal of Experimental Biology* 223 (21). <https://doi.org/10.1242/jeb.232090>.
- Berg, Cedric P. van den, Jolyon Troscianko, John A. Endler, N. Justin Marshall, and Karen L. Cheney. 2020. 'Quantitative Colour Pattern Analysis (QCPA): A Comprehensive Framework for the Analysis of Colour Patterns in Nature'. *Methods in Ecology and Evolution* 11 (2): 316–32. <https://doi.org/10.1111/2041-210X.13328>.
- Bertalmío, Marcelo, Luca Calatroni, Valentina Franceschi, Benedetta Franceschiello, Alexander Gomez Villa, and Dario Prandi. 2020. 'Visual Illusions via Neural Dynamics: Wilson–Cowan-Type Models and the Efficient Representation Principle'. *Journal of Neurophysiology* 123 (5): 1606–18. <https://doi.org/10.1152/jn.00488.2019>.
- Blakeslee, Barbara, and Mark E. McCourt. 2004. 'A Unified Theory of Brightness Contrast and Assimilation Incorporating Oriented Multiscale Spatial Filtering and Contrast



- Normalization'. *Vision Research* 44 (21): 2483–2503. <https://doi.org/10.1016/j.visres.2004.05.015>.
- Bloj, Marina G., Daniel Kersten, and Anya C. Hurlbert. 1999. 'Perception of Three-Dimensional Shape Influences Colour Perception through Mutual Illumination'. *Nature* 402 (6764): 877–79.
- Bossomaier, Terry, and Allan W. Snyder. 1986. 'Why Spatial Frequency Processing in the Visual Cortex?' *Vision Research* 26 (8): 1307–9.
- Boström, Jannika E., Marina Dimitrova, Cindy Canton, Olle Håstad, Anna Qvarnström, and Anders Ödeen. 2016. 'Ultra-Rapid Vision in Birds'. *PLoS ONE* 11 (3). <https://doi.org/10.1371/journal.pone.0151099>.
- Brainard, David H., and William T. Freeman. 1997. 'Bayesian Color Constancy'. *JOSA A* 14 (7): 1393–1411. <https://doi.org/10.1364/JOSAA.14.001393>.
- Brown, Richard O., and Donald I. A. MacLeod. 1997. 'Color Appearance Depends on the Variance of Surround Colors'. *Current Biology* 7 (11): 844–49. [https://doi.org/10.1016/S0960-9822\(06\)00372-1](https://doi.org/10.1016/S0960-9822(06)00372-1).
- Burns, S. A., A. E. Elsner, J. Pokorny, and V. C. Smith. 1984. 'The Abney Effect: Chromaticity Coordinates of Unique and Other Constant Hues'. *Vision Research* 24 (5): 479–89. [https://doi.org/10.1016/0042-6989\(84\)90045-2](https://doi.org/10.1016/0042-6989(84)90045-2).
- Carandini, Matteo, and David J. Heeger. 2012. 'Normalization as a Canonical Neural Computation'. *Nature Reviews Neuroscience* 13 (1): 51–62.
- Caves, Eleanor M., and Sönke Johnsen. 2018. 'AcuityView: An r Package for Portraying the Effects of Visual Acuity on Scenes Observed by an Animal'. *Methods in Ecology and Evolution* 9 (3): 793–97. <https://doi.org/10.1111/2041-210X.12911>.
- Chubb, C., G. Sperling, and J. A. Solomon. 1989. 'Texture Interactions Determine Perceived Contrast'. *Proceedings of the National Academy of Sciences* 86 (23): 9631–35. <https://doi.org/10.1073/pnas.86.23.9631>.
- Commission Internationale de l'Éclairage. 1978. 'Recommendations on Uniform Color Spaces, Color-Difference Equations, Psychometric Color Terms'. Paris: CIE.
- Conway, Bevil R. 2001. 'Spatial Structure of Cone Inputs to Color Cells in Alert Macaque Primary Visual Cortex (V-1)'. *Journal of Neuroscience* 21 (8): 2768–83.
- Daugman, John G. 1985. 'Uncertainty Relation for Resolution in Space, Spatial Frequency, and Orientation Optimized by Two-Dimensional Visual Cortical Filters'. *JOSA A* 2 (7): 1160–69.
- Derrington, A M, and P Lennie. 1984. 'Spatial and Temporal Contrast Sensitivities of Neurones in Lateral Geniculate Nucleus of Macaque.' *The Journal of Physiology* 357 (December): 219–40.
- Enroth-Cugell, Christina, and John G. Robson. 1966. 'The Contrast Sensitivity of Retinal Ganglion Cells of the Cat'. *The Journal of Physiology* 187 (3): 517–52.
- Fairchild, Mark D. 2013. *Color Appearance Models*. John Wiley & Sons.
- Field, David J. 1987. 'Relations between the Statistics of Natural Images and the Response Properties of Cortical Cells'. *Josa a* 4 (12): 2379–94.
- Foster, D.H. 2011. 'Color Constancy'. *Vision Research* 51 (7): 674–700.
- Geier, János, László Bernáth, Mariann Hudák, and László Séra. 2008. 'Straightness as the Main Factor of the Hermann Grid Illusion'. *Perception* 37 (5): 651–65. <https://doi.org/10.1068/p5622>.
- Georgeson, M A, and G D Sullivan. 1975. 'Contrast Constancy: Deblurring in Human Vision by Spatial Frequency Channels.' *The Journal of Physiology* 252 (3): 627–56.
- Ghim, Mimi M., and William Hodos. 2006. 'Spatial Contrast Sensitivity of Birds'. *Journal of Comparative Physiology A* 192 (5): 523–34. <https://doi.org/10.1007/s00359-005-0090-5>.
- Gilchrist, Alan. 2014. 'A Gestalt Account of Lightness Illusions'. *Perception* 43 (9): 881–95. <https://doi.org/10.1068/p7751>.
- Gregory, Richard L. 1997. 'Knowledge in Perception and Illusion'. *Philosophical Transactions of the Royal Society of London. Series B: Biological Sciences* 352 (1358): 1121–27.

- Hunt, Robert William Gainer. 2005a. *The Reproduction of Colour*. John Wiley & Sons.
- . 2005b. *The Reproduction of Colour*. John Wiley & Sons.
- Judd, Deane B. 1940. ‘Hue Saturation and Lightness of Surface Colors with Chromatic Illumination’. *JOSA* 30 (1): 2–32. <https://doi.org/10.1364/JOSA.30.000002>.
- Kane, David, and Marcelo Bertalmío. 2019. ‘A Reevaluation of Whittle (1986, 1992) Reveals the Link between Detection Thresholds, Discrimination Thresholds, and Brightness Perception’. *Journal of Vision* 19 (1): 16–16. <https://doi.org/10.1167/19.1.16>.
- Kim, Kil Joong, Rafal Mantiuk, and Kyoung Ho Lee. 2013. ‘Measurements of Achromatic and Chromatic Contrast Sensitivity Functions for an Extended Range of Adaptation Luminance’. In *Human Vision and Electronic Imaging XVIII*, 8651:86511A. International Society for Optics and Photonics.
- Kraft, J. M., and D. H. Brainard. 1999. ‘Mechanisms of Color Constancy under Nearly Natural Viewing’. *Proceedings of the National Academy of Sciences* 96 (1): 307–12. <https://doi.org/10.1073/pnas.96.1.307>.
- Kulikowski, J. J. 1976. ‘Effective Contrast Constancy and Linearity of Contrast Sensation’. *Vision Research* 16 (12): 1419–31.
- Land, Edwin H., and John J. McCann. 1971. ‘Lightness and Retinex Theory’. *JOSA* 61 (1): 1–11. <https://doi.org/10.1364/JOSA.61.000001>.
- Land, Edwin H. and others. 1977. *The Retinex Theory of Color Vision*. Scientific America. [http://xa.yimg.com/kq/groups/18365325/470399326/name/E.Land\\_-\\_Retinex\\_Theory%25255B1%25255D.pdf](http://xa.yimg.com/kq/groups/18365325/470399326/name/E.Land_-_Retinex_Theory%25255B1%25255D.pdf).
- Laughlin, Simon. 1981. ‘A Simple Coding Procedure Enhances a Neuron’s Information Capacity’. *Zeitschrift Für Naturforschung C* 36 (9–10): 910–12. <https://doi.org/10.1515/znc-1981-9-1040>.
- Marçelja, S. 1980. ‘Mathematical Description of the Responses of Simple Cortical Cells’. *JOSA* 70 (11): 1297–1300.
- Melin, Amanda D., Donald W. Kline, Chihiro Hiramatsu, and Tim Caro. 2016. ‘Zebra Stripes through the Eyes of Their Predators, Zebras, and Humans’. *PLOS ONE* 11 (1): e0145679. <https://doi.org/10.1371/journal.pone.0145679>.
- Monnier, Patrick, and Steven K. Shevell. 2003. ‘Large Shifts in Color Appearance from Patterned Chromatic Backgrounds’. *Nature Neuroscience* 6 (8): 801–2. <https://doi.org/10.1038/nn1099>.
- Mullen, K. T. 1985. ‘The Contrast Sensitivity of Human Colour Vision to Red-Green and Blue-Yellow Chromatic Gratings.’ *The Journal of Physiology* 359 (1): 381–400. <https://doi.org/10.1113/jphysiol.1985.sp015591>.
- Nassi, Jonathan J., Stephen G. Lomber, and Richard T. Born. 2013. ‘Corticocortical Feedback Contributes to Surround Suppression in V1 of the Alert Primate’. *Journal of Neuroscience* 33 (19): 8504–17. <https://doi.org/10.1523/JNEUROSCI.5124-12.2013>.
- Potier, Simon, Mindaugas Mitkus, and Almut Kelber. 2018. ‘High Resolution of Colour Vision, but Low Contrast Sensitivity in a Diurnal Raptor’. *Proceedings of the Royal Society B* 285 (1885): 20181036.
- Ratliff, Floyd. 1965. *Mach Bands: Quantitative Studies on Neural Networks*. San Francisco, CA: Holden-Day.
- Renoult, Julien P., Almut Kelber, and H. Martin Schaefer. 2017. ‘Colour Spaces in Ecology and Evolutionary Biology’. *Biological Reviews* 92 (1): 292–315. <https://doi.org/10.1111/brv.12230>.
- Rinner, Oliver, and Karl R. Gegenfurtner. 2000. ‘Time Course of Chromatic Adaptation for Color Appearance and Discrimination’. *Vision Research* 40 (14): 1813–26.
- Roe, Anna W., Leonardo Chelazzi, Charles E. Connor, Bevil R. Conway, Ichiro Fujita, Jack L. Gallant, Haidong Lu, and Wim Vanduffel. 2012. ‘Toward a Unified Theory of Visual Area V4’. *Neuron* 74 (1): 12–29. <https://doi.org/10.1016/j.neuron.2012.03.011>.
- Rohatgi, Ankit. 2020. ‘WebPlotDigitizer: Version 4.4’. <https://automeris.io/WebPlotDigitizer>.

- Ruderman, Daniel L., Thomas W. Cronin, and Chuan-Chin Chiao. 1998. 'Statistics of Cone Responses to Natural Images: Implications for Visual Coding'. *JOSA A* 15 (8): 2036–45.
- Schneider, Caroline A., Wayne S. Rasband, and Kevin W. Eliceiri. 2012. 'NIH Image to ImageJ: 25 Years of Image Analysis'. *Nat Methods* 9 (7): 671–75.
- Shapiro, Arthur G., and Dejan Todorovic. 2016. *The Oxford Compendium of Visual Illusions*. Oxford University Press.
- Shapley, Robert, Valerie Nunez, and James Gordon. 2019. 'Cortical Double-Opponent Cells and Human Color Perception'. *Current Opinion in Behavioral Sciences*, Visual perception, 30 (December): 1–7. <https://doi.org/10.1016/j.cobeha.2019.04.001>.
- Silvasti, Sanni A., Janne K. Valkonen, and Ossi Nokelainen. 2021. 'Behavioural Thresholds of Blue Tit Colour Vision and the Effect of Background Chromatic Complexity'. *Vision Research* 182 (May): 46–57. <https://doi.org/10.1016/j.visres.2020.11.013>.
- Simoncelli, Eero P., and Bruno A. Olshausen. 2001. 'Natural Image Statistics and Neural Representation'. *Annual Review of Neuroscience* 24 (1): 1193–1216.
- Simpson, Elisha E., N. Justin Marshall, and Karen L. Cheney. 2016. 'Coral Reef Fish Perceive Lightness Illusions'. *Scientific Reports* 6 (October): 35335. <https://doi.org/10.1038/srep35335>.
- Solomon, Samuel G., and Peter Lennie. 2007. 'The Machinery of Colour Vision'. *Nature Reviews Neuroscience* 8 (4): 276–86.
- Srinivasan, Mandyam Veerambudi, Simon Barry Laughlin, A. Dubs, and George Adrian Horridge. 1982. 'Predictive Coding: A Fresh View of Inhibition in the Retina'. *Proceedings of the Royal Society of London. Series B. Biological Sciences* 216 (1205): 427–59. <https://doi.org/10.1098/rspb.1982.0085>.
- Tadmor, Y., and D. J. Tolhurst. 2000. 'Calculating the Contrasts That Retinal Ganglion Cells and LGN Neurons Encounter in Natural Scenes'. *Vision Research* 40 (22): 3145–57.
- Troschianko, Jolyon, and Martin Stevens. 2015. 'Image Calibration and Analysis Toolbox – a Free Software Suite for Objectively Measuring Reflectance, Colour and Pattern'. *Methods in Ecology & Evolution* 6 (11): 1320–31. <https://doi.org/10.1111/2041-210X.12439>.
- Vorobyev, Misha, and D. Osorio. 1998. 'Receptor Noise as a Determinant of Colour Thresholds'. *Proceedings of the Royal Society of London. Series B: Biological Sciences* 265 (1394): 351–58.
- Wandell, Brian A. 1995. 'Foundations of Vision Sinauer Associates'. Inc. Sunderland MA.
- Watt, R. J., and M. J. Morgan. 1985. 'A Theory of the Primitive Spatial Code in Human Vision'. *Vision Research* 25 (11): 1661–74. [https://doi.org/10.1016/0042-6989\(85\)90138-5](https://doi.org/10.1016/0042-6989(85)90138-5).
- White, Michael. 1979. 'A New Effect of Pattern on Perceived Lightness'. *Perception* 8 (4): 413–16.
- Whittle, Paul. 1992. 'Brightness, Discriminability and the "Crispening Effect"'. *Vision Research* 32 (8): 1493–1507. [https://doi.org/10.1016/0042-6989\(92\)90205-W](https://doi.org/10.1016/0042-6989(92)90205-W).
- Witzel, Christoph, Hanna Valkova, Thorsten Hansen, and Karl R. Gegenfurtner. 2011. 'Object Knowledge Modulates Colour Appearance'. *I-Perception* 2 (1): 13–49.
- Yuille, Alan, and Daniel Kersten. 2006. 'Vision as Bayesian Inference: Analysis by Synthesis?' *Trends in Cognitive Sciences* 10 (7): 301–8.

## Supplementary Material

### **Description of the Spatiochromatic Bandwidth Limited model**

#### Model input Requirements:

- A linear cone-catch image of known angular width. For example, cone-catch images created by the micaToolbox (Troscianko & Stevens 2015), or sRGB images converted to linear CIE XYZ channels. Our implementation accepts either sRGB images or cone catch images, and uses 32-bit images and processing throughout; 8-bits per channel is an insufficient dynamic range for coding linear natural scenes. The image should be scaled so that its resolution matches or exceeds the highest spatial frequency being modelled. For example, the DoG kernel we use has its peak wavelength sensitivity at 5.7 pixels, and the highest SF we model is 16 cpd, so the image should be scaled so that each degree of angular width has 16 x 5.7 pixels, i.e. 91.2 pixels per degree.
- Contrast sensitivity functions (CSFs) for the luminance and chromatic opponent channels (red-green and blue-yellow). Our code uses values from Kim et al. (2013). These values should be scaled so that contrasts are Michelson Contrast values - e.g. (red-green)/(red+green). Note that sensitivity is the inverse of the threshold contrast (i.e. *higher* sensitivity = *lower* threshold contrasts, Figure 2a).
- Bandwidth values ( $\epsilon$ ) for luminance and each chromatic opponent channel (i.e. three values for human vision). These can be estimated from behavioural data (e.g. crispening effect, Figure 3a), or from neurophysiological data (Figure 3b). Suitable data are currently lacking for chromatic channel bandwidth, but we assume the red-green channel bandwidth equals that for the luminance channel, and the blue-yellow channel has about 30% of this bandwidth, in order to achieve efficient coding in natural scenes.
- Gain functions specify how each spatial frequency should be scaled following the clipping process. These are calculated by processing a library of images of natural scenes through the model with all gain values set to 1 (i.e. no gain), and measuring the resulting standard deviation of each channel. Normalising to these values gives output contrasts with standard deviations of 1 at each spatial frequency.

The values we used are supplied in the supplementary code.

### 328 Image Pre-Processing:

329 The cone catch image is converted to three channels: luminance, red-green opponency and blue-  
330 yellow opponency. The luminance channel is the average of all cone catch values from each  
331 receptor class, weighted by their cone ratios:

$$332 \quad lum = 0.629 R + 0.314 G + 0.057 B$$

333 Where R, G, and B are the longwave, mediumwave and shortwave cone catch pixel values  
334 respectively. Cone ratios here are from Hofer *et al.* (2005).

335

336 The chromatic signals are calculated as Michelson contrasts:

$$RedGreen = \frac{R - G}{R + G}$$

338

### 339 Spatial Filtering

340 Each channel is convolved with either a Difference-of-Gaussian kernel or Gabor kernel. DoG  
341 kernels are orientation-insensitive, and are used for luminance and chromatic channels. Gabor  
342 kernels are orientation sensitive and are optionally used instead of DoG for the luminance channel.  
343 Our implementation uses conventional kernel functions (see code for exact parameters, examples  
344 shown in Figure 1b); for the DoG the surround has a sigma value 1.6 times larger than the centre,  
345 and for the Gabor filter we use 4 orientations (sigma = 2, gamma = 1, frequency = 3). Our spatial  
346 filtering differs from that used previously in that we use Michelson Contrasts. Conventionally, the  
347 spatial filtering procedure uses logged input images and then applies a convolution. The result is  
348 mathematically identical to dividing the centre response by the surround. While this is  
349 computationally efficient, the resulting contrasts are non-linear and unbounded (e.g. values can  
350 easily go implausibly high), and cannot be reliably matched to the behaviour described in CSFs.  
351 The chromatic channels have already had the Michelson contrast function applied, so the  
352 convolution is equivalent to simulating Michelson contrasts based on red-centre versus green-  
353 surround, or yellow-centre versus blue-surround giving contrast values,  $\phi$ . However, the Michelson  
354 contrast stage must be applied to the luminance channel following spatial filtering in order to  
355 compare centre and surround (or positive and negative regions in the Gabor kernel), i.e.:

$$\phi = m \frac{centre - surround}{centre + surround}$$

357 Our implementation achieves this by calculating both signed and unsigned (absolute) convolutions  
358 for the numerator and denominator respectively.  $m$  is a parameter that scales the kernel's (arbitrary)  
359 amplitude to create contrasts that match the same scale as the contrast sensitivity functions. CSFs  
360 are generally calculated using sinewave gratings, so to calculate  $m$  we first create an image with a  
361 sinewave spatial frequency that matches the kernel's peak sensitivity (5.7 pixels in our case). The  
362 sinewave amplitude is set to a known Michelson contrast of e.g. 0.1, and then is convolved with the  
363 kernel.  $m$  is then the maximum contrast from the convolved image divided by the Michelson  
364 contrast of the input sinewave (i.e. 0.1). This simply scales the contrasts,  $\phi$ , so that they are directly  
365 comparable to the conditions used to measure CSFs.

366

### 367 Clipping

368 The activation threshold,  $\alpha$ , is the inverse of contrast sensitivity, specified by the CSF at each spatial  
369 frequency,  $\omega$  (see Figure 2a for example CSFs):

370

$$\alpha_{\omega} = \frac{1}{\text{ContrastSensitivity}_{\omega}}$$

371 Any contrasts below the saturation threshold are set to zero, while all other contrasts have the  
372 saturation threshold subtracted (Kulikowski 1976):

373

$$\begin{aligned} \text{If } \varphi < \alpha_{\omega} \text{ and } \varphi > 0, \varphi_{\text{clipped}} &= 0 \\ \text{elseif } \varphi > 0, \varphi_{\text{clipped}} &= \varphi - \alpha_{\omega} \end{aligned}$$

374 The sign is preserved for negative contrasts (i.e. the model assumes both centre-on and centre-off  
375 behaviour, described by positive or negative convolved pixel values respectively). However, in  
376 natural scenes the luminance DoG convolution results in negative contrasts that are twice as large as  
377 the positive ones (this does not apply to chromatic DoG or Gabor convolutions, where positive  
378 contrasts match negative contrasts). Following the principles of efficient coding we therefore  
379 assume that any centre-off channels are tuned to the same dynamic range, and multiply  $\alpha$  by 2 i.e.:

380

$$\begin{aligned} \text{If } \varphi > -2\alpha_{\omega} \text{ and } \varphi < 0, \varphi_{\text{clipped}} &= 0 \\ \text{elseif } \varphi < 0, \varphi_{\text{clipped}} &= \varphi + 2\alpha_{\omega} \end{aligned}$$

381 Bandwidth,  $\epsilon$ , is assumed to be uniform across all spatial frequencies, and this is used to calculate  
382 the saturation threshold,  $\beta$ , at each spatial frequency:

383

$$\beta_{\omega} = \alpha_{\omega} \epsilon$$

384 The bandwidth can either be estimated by fitting the model to behavioural data (Figure 3a), or based  
385 on the dynamic range of single neurones (Figure 3b). Contrasts greater than the saturation threshold  
386 are set to equal the saturation threshold, creating a hard upper threshold. As above, negative  
387 contrasts are doubled for luminance DoG models (but not chromatic or Gabor models):

388

$$\begin{aligned} \text{If } \varphi > \beta_{\omega}, \varphi_{\text{clipped}} &= \beta_{\omega} \\ \text{elseif } \varphi < -2\beta_{\omega}, \varphi_{\text{clipped}} &= 2\beta_{\omega} \end{aligned}$$

389 This clipping process defines the dynamic range of the model at each spatial frequency. The result is  
390 that spatial frequencies with high contrast sensitivity also saturate much faster with increasing  
391 contrast, resulting in small dynamic range. Meanwhile spatial frequencies with low contrast  
392 sensitivity have a much larger dynamic range (Figure 2b). However, the overlap in sensitivity  
393 between adjacent spatial frequencies means that almost all contrasts are within the dynamic range of  
394 one or more spatial frequencies (the orange areas in Figure 2f), implying low bandwidths can be  
395 combined with high contrast sensitivity for efficient coding as long as there is a large range in  
396 dynamic ranges, and sufficient overlap in adjacent spatial frequencies. This explains why humans  
397 can perceive contrasts in natural scenes (or on high-definition televisions) over a dynamic range  
398 greater than 10,000:1, while our dynamic range for sinewaves is around 200:1.

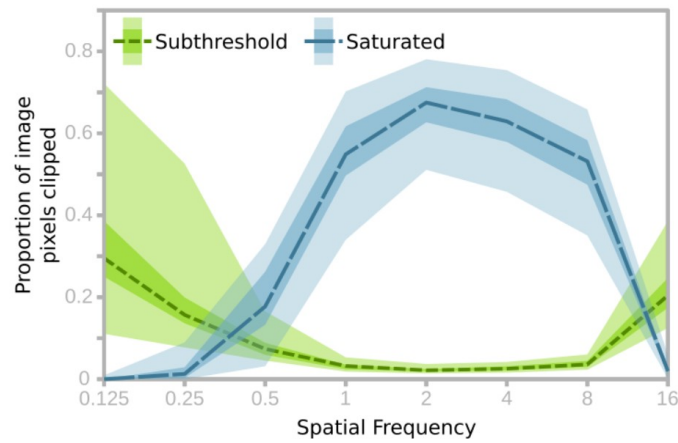

399

400 **Supplementary Figure 1.** Plot showing the proportion of pixels in each channel that are either saturated or sub-  
401 threshold in typical natural scenes. The results are based on 34 images of natural scenes, dashed lines show the median  
402 value, shaded areas show the interquartile range and full range of the data. High contrast sensitivity at intermediate  
403 spatial frequencies causes substantially more saturation, while the lower sensitivity channels show substantial  
404 proportion of subthreshold contrasts.

405

#### 406 Gain

407 Following clipping, contrasts are multiplied so that each spatial frequency results in equal  
408 contribution to the contrasts in the pooled image. i.e. in natural scene statistics each spatial  
409 frequency should contain equal contrast/information (Field, 1987), however the clipping process  
410 substantially reduces the average amplitude of contrasts at intermediate spatial frequencies. The  
411 gain step equalises the average contrast amplitudes at each spatial frequency, i.e.:

412

$$\Phi = \frac{\varphi_{clipped}}{\sigma_{\omega}}$$

413 Where  $\sigma_{\omega}$  is the standard deviation of all  $\varphi_{clipped}$  values in an image of a natural scene filtered at spatial  
414 frequency  $\omega$ , resulting in gain-corrected contrasts,  $\Phi$ .

415

#### 416 Post-clipping smoothing

417 The hard upper and lower clipping thresholds ( $\alpha$  and  $\beta$ ) produce undesirable artefacts in the pooled image.  
418 We remove these by applying a Gaussian blur to each channel prior to pooling, with sigma values well below  
419 the filter's spatial frequency (e.g. sigma value below 1 pixel radius, where the kernel's peak wavelength  
420 sensitivity is 5.7 pixels). This step removes the artefacts, and the smoothing effect is responsible for the  
421 curvature near the saturation threshold shown in Figure 3b, matching the behaviour of primate ganglia  
422 (Derrington and Lennie, 1984). This stage mirrors the correlated firing of neighbouring retinal ganglion cells  
423 cells where on-centre cells excite neighbouring on-centre cells, and likewise for off-centre cells, while on-  
424 centre and off-centre cells inhibit one-another (Nelson 1995).

425

#### 426 Pooling

427 Pooling simply sums the contrast at each pixel location across each spatial frequency:

428

$$PooledOutput = \sum_{\omega_{min}}^{\omega_{max}} \Phi$$

429 This results in recombined luminance, red-green and blue-yellow chromatic channels. This output is  
430 designed to match subjective colour appearance, and it is therefore not straightforward to present these  
431 images on an sRGB display without confounding the very effects it seeks to predict. Nevertheless, we can  
432 convert back to a space that roughly approximates the cone-catch input:

433

$$R_{output} = \frac{2 Lum}{1 + (1 - RedGreen) / (1 + RedGreen)}$$

434

$$G_{output} = \frac{R_{output}}{(1 + RedGreen) / (1 - RedGreen)}$$

435

$$B_{output} = Lum \frac{1 + (1 - BlueYellow)}{1 + BlueYellow} - Lum$$

436



Appendix to "A model of colour appearance based on efficient coding of natural images" by Jolyon Troscianko & Daniel Osorio

|     |                                                                      |
|-----|----------------------------------------------------------------------|
| Key | Predicts effect and relevant controls                                |
|     | Predicts effect, but not controls, or only partially predicts effect |
|     | Cannot not predict effect                                            |

| Phenomenon Family    | Phenomenon                                                                                                                                                                                                                                                                                                                                                                                                                                                                                                                                                                                                                                                                                                                                                                           | Description                      | Source                                                                                                                                                                                                | DoG (non-oriented) Model                                             | Gabor (oriented) Model                                                                                         |                                                                                                                   |
|----------------------|--------------------------------------------------------------------------------------------------------------------------------------------------------------------------------------------------------------------------------------------------------------------------------------------------------------------------------------------------------------------------------------------------------------------------------------------------------------------------------------------------------------------------------------------------------------------------------------------------------------------------------------------------------------------------------------------------------------------------------------------------------------------------------------|----------------------------------|-------------------------------------------------------------------------------------------------------------------------------------------------------------------------------------------------------|----------------------------------------------------------------------|----------------------------------------------------------------------------------------------------------------|-------------------------------------------------------------------------------------------------------------------|
| Crispensing Effect   | The crispensing effect causes perceived contrasts to be greater when the grey levels are nearer those of the background. The effect was modelled by Whittle (1992), and subsequent work suggests the dipper effect [Solomon, (2009)] and divisive gain explains the effect [Kane and Bertalmio (2019)]. Here we use Whittle's 1992 data to determine the dynamic range of human luminance vision.                                                                                                                                                                                                                                                                                                                                                                                    |                                  |                                                                                                                                                                                                       |                                                                      |                                                                                                                |                                                                                                                   |
|                      |                                                                                                                                                                                                                                                                                                                                                                                                                                                                                                                                                                                                                                                                                                     | Grey background                  | Human subjects adjusted grey targets in equal-contrast steps on a grey background                                                                                                                     | Generated from Whittle (1992) data                                   | DoG fit, DR=15, R <sup>2</sup> =0.994                                                                          | Gabor fit, DR=3.75, R <sup>2</sup> =0.995<br>Both models outperform CIE L (R <sup>2</sup> =0.944)                 |
|                      |                                                                                                                                                                                                                                                                                                                                                                                                                                                                                                                                                                                                                                                                                                     | White background                 | As above with white background                                                                                                                                                                        | Generated from Whittle (1992) data                                   | DoG fit when using the above DR R <sup>2</sup> = 0.946                                                         | Gabor fit when using the above DR, R <sup>2</sup> = 0.935<br>Both models outperform CIE L (R <sup>2</sup> =0.746) |
| Contrast sensitivity | The ability of humans and other animals to perceive contrasts is dependent on the spatial frequency of those contrasts. Contrast sensitivity functions describe the contrast a of a sinwave that is detectable at different spatial frequencies. A related phenomenon is contrast constancy, where suprathreshold contrasts appear to be uniform irrespective of spatial frequency.                                                                                                                                                                                                                                                                                                                                                                                                  |                                  |                                                                                                                                                                                                       |                                                                      |                                                                                                                |                                                                                                                   |
|                      |                                                                                                                                                                                                                                                                                                                                                                                                                                                                                                                                                                                                                                                                                                     | Contrast sensitivity functions   | Sinewaves are generated with specific Michelson contrasts to ensure the model only permits detectable contrasts.                                                                                      | Generated                                                            | Removes sub-threshold contrasts, matching CSF                                                                  |                                 |
|                      |                                                                                                                                                                                                                                                                                                                                                                                                                                                                                                                                                                                                                                                                                                                                                                                      | Contrast constancy               | Suprathreshold sinewaves of different spatial frequencies should have equal amplitudes.                                                                                                               |                                                                      | Suprathreshold contrast constancy is enhanced by saturation thresholds preventing multiplicative gain effects. |                                                                                                                   |
| Brightness illusions | This family of illusions causes grey targets to differ in perceived brightness dependent on the arrangement of (typically high contrast) surrounds. Some of these illusions, such as simultaneous contrast and Mach bands have traditionally been attributed to centre-surround antagonism [Eagleman (2001)]. However the White illusions create the opposite effect, and have variously been attributed to oriented filtering with normalisation [Bertalmio et al. (2020), Blakeslee et al. (2016)], T-junctions [e.g. see Adelson (2000)], Gestalt/grouping/anchoring based mechanisms [Gilchrist (2014)]. A further set of illusions have been attributed to 3D surface and lighting based inferences [see Adelson (2000)], or atmospheric-based inferences [see Adelson (2000)]. |                                  |                                                                                                                                                                                                       |                                                                      |                                                                                                                |                                                                                                                   |
|                      |                                                                                                                                                                                                                                                                                                                                                                                                                                                                                                                                                                                                                                                                                                   | White's bars                     | A grey bar flanked by black appears darker than the same grey flanked by white                                                                                                                        | Adapted from Blakeslee & McCourt (2004), and Bertalmio et al. (2020) |                                                                                                                |                               |
|                      |                                                                                                                                                                                                                                                                                                                                                                                                                                                                                                                                                                                                                                                                                                   | White's offset bars              | As above with offset surrounds                                                                                                                                                                        |                                                                      |                                                                                                                |                               |
|                      |                                                                                                                                                                                                                                                                                                                                                                                                                                                                                                                                                                                                                                                                                                   | White's checkerboard             | A grey square flanked by black squares appears darker than the same grey flanked by white squares                                                                                                     |                                                                      |                                                                                                                |                               |
|                      |                                                                                                                                                                                                                                                                                                                                                                                                                                                                                                                                                                                                                                                                                                   | Simultaneous brightness contrast | The central grey bar is a uniform grey value, but the gradient in the background creates a powerful inverse luminance gradient in the bar. This is typically explained by centre-surround antagonism. | Generated                                                            | Both models create an inverse gradient, though the Gabor model's is more linear across the entire bar length.  |                               |
|                      |                                                                                                                                                                                                                                                                                                                                                                                                                                                                                                                                                                                                                                                                                                   | Simultaneous brightness contrast | A grey square surrounded by black appears darker than the same grey surrounded by white.                                                                                                              | Adapted from Bertalmio et al. (2020)                                 |                                                                                                                |                               |

|                                                                                     |                                                                                                                                                                                                                                                             |                                                     |                                                                                                                                                                                                                                                                                                        |                                                                                       |                                                                                                                                                                               |                                                                                       |
|-------------------------------------------------------------------------------------|-------------------------------------------------------------------------------------------------------------------------------------------------------------------------------------------------------------------------------------------------------------|-----------------------------------------------------|--------------------------------------------------------------------------------------------------------------------------------------------------------------------------------------------------------------------------------------------------------------------------------------------------------|---------------------------------------------------------------------------------------|-------------------------------------------------------------------------------------------------------------------------------------------------------------------------------|---------------------------------------------------------------------------------------|
|    | <p><b>Chevreul staircase</b></p> <p>The steps in a sequence of grey levels from light to dark appear flat/homogeneous on a contrasting gradient, but when viewed against a matching gradient each step appears to have a strong internal gradient.</p>      |                                                     | <p>The internal gradients are much stronger in the lower rather than upper staircase</p>                                                                                                                                                                                                               |    | <p>The internal gradients are much stronger in the lower rather than upper staircase</p>                                                                                      |    |
|    | <p><b>Chevreul staircase control</b></p> <p>Geier &amp; Hudák (2011) find that the illusion persists when a counter-gradient surround is placed around the illusion, and suggest that traditional centre-surround antagonism cannot explain the effect.</p> | <p><i>Adapted from Geier &amp; Hudák (2011)</i></p> | <p>As above, though the effect is not as powerful</p>                                                                                                                                                                                                                                                  |    | <p>As above, though the effect is not as powerful</p>                                                                                                                         |    |
|    | <p><b>Chevreul staircase control</b></p> <p>As above, however a white surround is found to eliminate the internal gradients of the staircases.</p>                                                                                                          |                                                     | <p>Still retains fairly clear internal gradients, although they are less powerful than above</p>                                                                                                                                                                                                       |    | <p>Still retains fairly clear internal gradients, although they are less powerful than above</p>                                                                              |    |
|    | <p><b>Dungeon illusion</b></p> <p>A light grid causes a grey rectangle to appear lighter than the same grey surrounded by a dark grid.</p>                                                                                                                  | <p><i>Gilchrist (2014)</i></p>                      |                                                                                                                                                                                                                                                                                                        |    |                                                                                                                                                                               |    |
|    | <p><b>Grating induction</b></p> <p>Illusory checkerboard patterns are created in a horizontal grey bar placed over a vertical grating.</p>                                                                                                                  | <p><i>Adapted from Bertalmio et al. (2020)</i></p>  |                                                                                                                                                                                                                                                                                                        |    |                                                                                                                                                                               |    |
|   | <p><b>Hong-Shevell illusion</b></p> <p>Circular variant of White's bar illusion. The grey ring neighbouring white rings appears lighter, and the same grey neighbouring dark rings appears darker.</p>                                                      | <p><i>From Bertalmio et al. (2020)</i></p>          |                                                                                                                                                                                                                                                                                                        |   |                                                                                                                                                                               |   |
|  | <p><b>Luminance illusion</b></p> <p>Simultaneous brightness illusion that uses a background gradient.</p>                                                                                                                                                   |                                                     |                                                                                                                                                                                                                                                                                                        |  |                                                                                                                                                                               |  |
|  | <p><b>Poggendorff illusion</b></p> <p>Illusory stripes are created in a grey bar placed over a diagonal grating.</p>                                                                                                                                        |                                                     | <p>Illusory stripes don't span the entire height of the bar</p>                                                                                                                                                                                                                                        |  |                                                                                                                                                                               |  |
|  | <p><b>Corrugated plaid</b></p> <p>The perceived brightness of identical grey patches on a checkerboard can be altered by various 3D and shading manipulations. The controls demonstrate how 3D-inference does not explain the effect [Adelson (2000)].</p>  | <p><i>Figures from Adelson (2000)</i></p>           | <p>Correctly predicts the direction and approximate magnitude of the effect. i.e. the effect is most powerful in the lower two versions with a parallelogram (rather than square) tile. Effect is 31% more powerful in the middle, and 34% more powerful in the lower version compared to the top.</p> |  | <p>Same as DoG to the left, although even more powerful. The effect is 296% more powerful in the middle, and 147% more powerful in the lower version compared to the top.</p> |  |

|  |                                               |                                                                                                                                                                                                                                                                               |                                                                                                                                                                                                                                                                          |                                                                                                                           |                                                                                                                                                                                            |  |  |
|--|-----------------------------------------------|-------------------------------------------------------------------------------------------------------------------------------------------------------------------------------------------------------------------------------------------------------------------------------|--------------------------------------------------------------------------------------------------------------------------------------------------------------------------------------------------------------------------------------------------------------------------|---------------------------------------------------------------------------------------------------------------------------|--------------------------------------------------------------------------------------------------------------------------------------------------------------------------------------------|--|--|
|  | <p><b>Haze illusion</b></p>                   | <p>Dark, high contrast surrounds increase perceived brightness of the lower tile. Adelson attributes the effect to perceived atmospheric differences between the tiles.</p>                                                                                                   | <p>Lower tile 11% brighter than upper tile</p>                                                                                                                                                                                                                           |                                                                                                                           | <p>Lower tile 21% brighter than upper tile</p>                                                                                                                                             |  |  |
|  | <p><b>Crisscross illusion</b></p>             | <p>A patterned grey target surrounded by a light background appears darker than the same grey with dark surrounds. Note this is the opposite effect of White's illusions, and is similar to simultaneous contrast.</p>                                                        |                                                                                                                                                                                                                                                                          |                                                                                                                           |                                                                                                                                                                                            |  |  |
|  | <p><b>Snake illusion</b></p>                  | <p>Similar to the crisscross illusion above, however a control shows how the effect can be negated by removing "atmospheric" bands.</p>                                                                                                                                       | <p>Brightness illusion in the upper version with haze layer is more powerful than the lower (control)</p>                                                                                                                                                                |                                                                                                                           | <p>Same as DoG (left), with an even larger difference between upper and lower</p>                                                                                                          |  |  |
|  | <p><b>Koffka rings</b></p>                    | <p>An intact grey ring appears uniform when viewed against a split light/dark surround. However, when the ring is split into two halves and separated slightly the two sides have a strong brightness difference. Offsetting the rings has a similar effect.</p>              | <p>The separated ring (centre) has a contrast between left and right sides 51% higher than the intact ring, and the offset ring (lower) has a contrast 8% higher than the intact ring. A lower dynamic range can eliminate all internal contrast in the intact ring.</p> |                                                                                                                           | <p>Same as DoG (left), separated ring is 66% higher contrast and offset ring is 13% higher contrast than the intact ring. Likewise, the effect is enhanced with a lower dynamic range.</p> |  |  |
|  | <p><b>Adelson checker shadow illusion</b></p> | <p>The shadow cast onto the checkerboard causes the shaded square to appear brighter than a square with the same grey level outside of the shadow.</p>                                                                                                                        | <p><i>Adelson (1995). Retrieved from wikipedia.</i></p>                                                                                                                                                                                                                  |                                                                                                                           |                                                                                                                                                                                            |  |  |
|  | <p><b>Reverse contrast illusion</b></p>       | <p>The grey diagonal bar surrounded by black bars and white background appears brighter, and the opposite is true for an inverted example.</p>                                                                                                                                | <p><i>Figures from Gilchrist (2014)</i></p>                                                                                                                                                                                                                              |                                                                                                                           |                                                                                                                                                                                            |  |  |
|  | <p><b>Benary cross illusion</b></p>           | <p>The triangle cutting into the arm of the cross appears brighter than the triangle that spans between two arms.</p>                                                                                                                                                         |                                                                                                                                                                                                                                                                          |                                                                                                                           |                                                                                                                                                                                            |  |  |
|  | <p><b>Wedding cake illusion</b></p>           | <p>Variation of White's bar illusion with zigzag background</p>                                                                                                                                                                                                               | <p><i>Spehar &amp; Clifford (2017)</i></p>                                                                                                                                                                                                                               |                                                                                                                           |                                                                                                                                                                                            |  |  |
|  | <p><b>Mach bands</b></p>                      | <p>Mach bands are the perceived light and dark stripes created where a ramp of grey meets a flat grey. Mach bands are traditionally explained by centre-surround antagonism, but other theories have been used to explain their presence or absence [see Kingdom (2014)].</p> | <p><i>Generated following Kingdom (2014)</i></p>                                                                                                                                                                                                                         | <p>Predicts the Mach band effect will be most powerful when the ramp is a similar width to peak sensitivity SF (4cpd)</p> | <p>Similar to DoG (left)</p>                                                                                                                                                               |  |  |

|                                                                                     |                                                                                                                                                                                                                                                                                                                                                                 |                                                                                                                                                                                                                                                                                                                                                                                                                                                                                                                                                              |                                                                                    |                                                                                                                                                                                                                            |                                                                                                                                                                                                                         |                                                                                                                                                                                                             |                                                                                       |
|-------------------------------------------------------------------------------------|-----------------------------------------------------------------------------------------------------------------------------------------------------------------------------------------------------------------------------------------------------------------------------------------------------------------------------------------------------------------|--------------------------------------------------------------------------------------------------------------------------------------------------------------------------------------------------------------------------------------------------------------------------------------------------------------------------------------------------------------------------------------------------------------------------------------------------------------------------------------------------------------------------------------------------------------|------------------------------------------------------------------------------------|----------------------------------------------------------------------------------------------------------------------------------------------------------------------------------------------------------------------------|-------------------------------------------------------------------------------------------------------------------------------------------------------------------------------------------------------------------------|-------------------------------------------------------------------------------------------------------------------------------------------------------------------------------------------------------------|---------------------------------------------------------------------------------------|
|    | <p>Hilbert-transformed Mach band</p>                                                                                                                                                                                                                                                                                                                            | <p>Various transforms have been shown to disrupt the Mach band effect, such as this Hilbert transform. These transforms generally simply remove the high spatial frequency "foot" of the Mach band.</p>                                                                                                                                                                                                                                                                                                                                                      |                                                                                    | <p>Correctly predicts no Mach bands</p>                                                                                                                                                                                    |                                                                                                                                       | <p>Correctly predicts no Mach bands</p>                                                                                                                                                                     |    |
|    | <p>Hermann grid and wavy grid</p>                                                                                                                                                                                                                                                                                                                               | <p>The Hermann grid (upper image) causes dark spots to appear at the intersections between squares. The effect seems to depend on straight edges, and a curved grid (wavy grid, lower) does not create the illusory spots.</p>                                                                                                                                                                                                                                                                                                                               | <p>Geier et al. (2008)</p>                                                         | <p>The DoG model does not simulate the effect. Altering the gain values enables the DoG model to simulate the effect, but then it is also present in the control wavy grid.</p>                                            |                                                                                                                                       | <p>Correctly predicts that dark spots should appear on the straight-angled grid, but not with the wavy grid. The curved edges prevent the Gabor filters from bridging the gap between opposing corners.</p> |    |
| <p>Contrast induction</p>                                                           | <p>A target's internal contrast is influenced by the contrast of its surrounds. The causes are unclear, though are generally thought to depend on local normalisation of contrasts.</p>                                                                                                                                                                         |                                                                                                                                                                                                                                                                                                                                                                                                                                                                                                                                                              |                                                                                    |                                                                                                                                                                                                                            |                                                                                                                                                                                                                         |                                                                                                                                                                                                             |                                                                                       |
|    | <p>Textural contrast induction</p>                                                                                                                                                                                                                                                                                                                              | <p>Low contrast surrounds increase perceived target contrast, and this effect is most pronounced when the spatial frequency (SF) of the surround matches the target. In these example images the target on the left appears to have higher internal contrast than the same target on the right. The effect is most pronounced in the centre version with a matched spatial frequency.</p>                                                                                                                                                                    | <p>Adapted from Chubb et al. (1989)</p>                                            | <p>Target contrast is enhanced on a low-contrast background, and most powerfully for SF-matched background. Target SD is enhanced 4%, 17% and 11% for high SF, matched SF, and low SF respectively.</p>                    |                                                                                                                                       | <p>Correctly predicts effect more powerfully than DoG (left). The target SD is enhanced 19%, 24% and 22% for high SF, matched SF, and low SF respectively.</p>                                              |    |
|   | <p>Orientation-dependent contrast induction ("tilt illusion")</p>                                                                                                                                                                                                                                                                                               | <p>High contrast surrounds reduce perceived target contrast when texture orientations match. In the example here the upper target has bars aligned with the background (in phase). In the centre is the same target rotated 90 degrees (orientations mismatched), and it appears to have a higher contrast. We also include a final control where the aligned target is out of phase with the surround. This target also appears to have higher contrast than the in-phase upper target (implying the effect is not entirely controlled by orientation).</p> | <p>Custom figure with control, see Bertalmio et al. (2020) for similar effect.</p> | <p>Interestingly the DoG model (without orientation sensitivity) is able to simulate the effect, albeit weakly. Compared to the top, internal SD is 6% higher in the middle target, and 4% higher in the lower target.</p> |                                                                                                                                      | <p>The oriented model is able to predict the contrast induction effect. Compared to the top, internal SD is 10% higher in the middle target and 11% higher in the lower target.</p>                         |   |
|  | <p>Chromatic contrast induction</p>                                                                                                                                                                                                                                                                                                                             | <p>High chromatic-contrast surrounds reduce perceived chromaticity. The high and low-contrast surrounds have the same luminance, red-green, and blue-yellow background averages. The targets appear to be more colourful (higher chromaticity) in the lower image.</p>                                                                                                                                                                                                                                                                                       | <p>Adapted from Brown &amp; MacLeod (1997)</p>                                     | <p>Chromaticity (average Euclidean distance from each target's colour to the background average) is 19% higher on the low contrast background.</p>                                                                         |                                                                                                                                     | <p>Chromatic channels use DoG, so only luminance varies (same 19% chromatic induction effect as left). The model also predicts chromatic grating induction in the high contrast surround.</p>               |  |
| <p>Colour constancy and chromatic adaptation</p>                                    | <p>Colour constancy causes surfaces to appear to have the same colour under different lighting colours, generally attributed to chromatic adaptation. The mechanism by which this occurs is poorly understood, and models of whole scene averages, local surround averages and local maxima do not explain the effects fully [Kraft &amp; Brainard (1999)].</p> |                                                                                                                                                                                                                                                                                                                                                                                                                                                                                                                                                              |                                                                                    |                                                                                                                                                                                                                            |                                                                                                                                                                                                                         |                                                                                                                                                                                                             |                                                                                       |
|  | <p>Lotto, Purves &amp; Nundy cube</p>                                                                                                                                                                                                                                                                                                                           | <p>The cube is rendered with different simulated lighting conditions: yellow-tinted and blue-tinted. Colour-constancy causes grey tiles to appear blue in the yellow-tinted example, and yellow in the blue-tinted example.</p>                                                                                                                                                                                                                                                                                                                              | <p>Purves et al. (2002)</p>                                                        | <p>Models colour constancy effects (i.e. grey in the left becomes blue, grey on the right becomes yellow). Also models brightness induction effect.</p>                                                                    |                                                                                                                                                                                                                         |                                                                                                                                                                                                             |   |
|  | <p>Simulated chromatic adaptation of natural scene, here the linear red channel is multiplied by 5</p>                                                                                                                                                                                                                                                          | <p>Chromatic adaptation lets us (and other animals) estimate the colour of an object even as the colour of the illuminant shifts. So, for example, as illuminant colour alters with weather and time of day, objects appear to stay the same colour.</p>                                                                                                                                                                                                                                                                                                     | <p>Generated example</p>                                                           | <p>Chromatic modelling only uses DoG, however in this case we use the Gabor model for</p>                                                                                                                                  | <p>The model is largely robust against even comparatively extreme differences in a scene's simulated illumination colour. Nevertheless, the model will start to show differences when the colours become so extreme</p> |                                                                                                                        |                                                                                       |

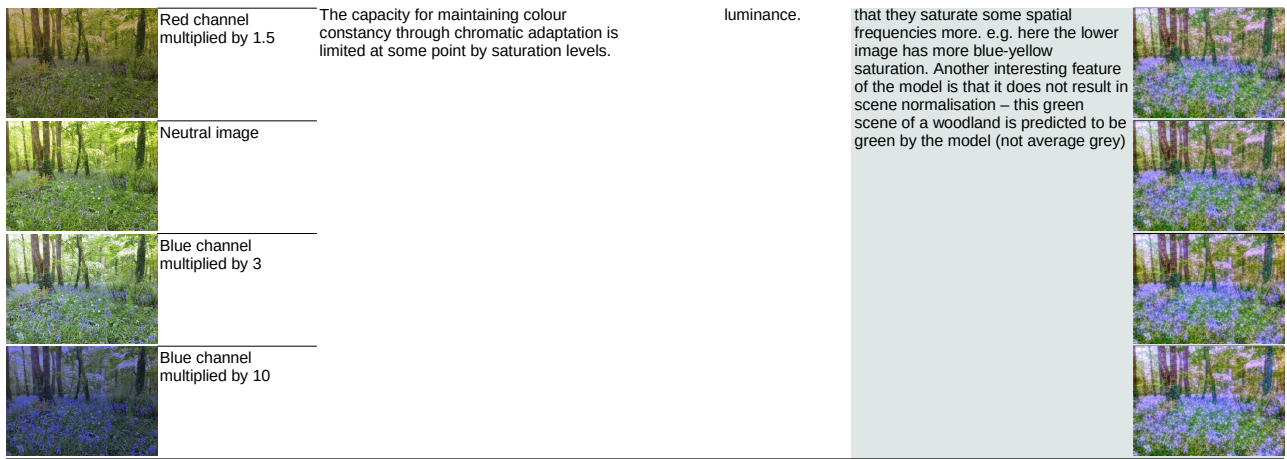

Chromatic simultaneous contrast Simultaneous contrast causes a target's colour to shift in the opposite direction as its surrounds. This was one of the first visual illusions to have been described 1000 years ago by Ibn al-Haytham [Sabra (1989)], who noted that green paint surrounded by blue appeared red-tinted, while the same paint surrounded by yellow appeared green-tinted.

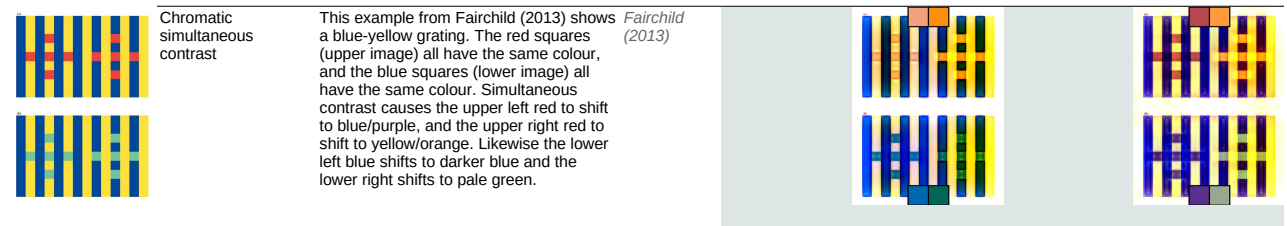

Colour Assimilation Also known as the von Bezold spreading effect, this causes a colour to blend with the colour of its surrounds under certain circumstances. This is the opposite of simultaneous contrast, and early research established the conditions that cause each situation. See Kingdom (2017) for a review.

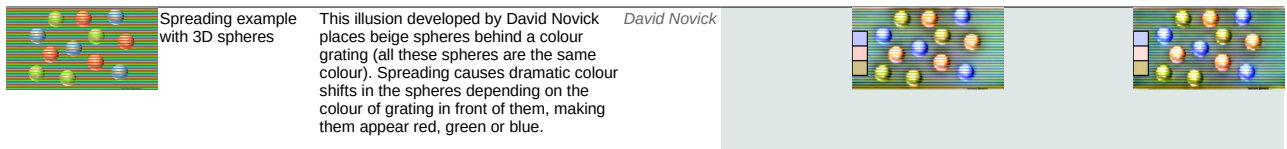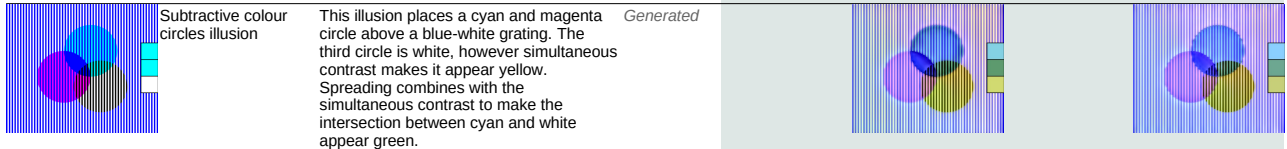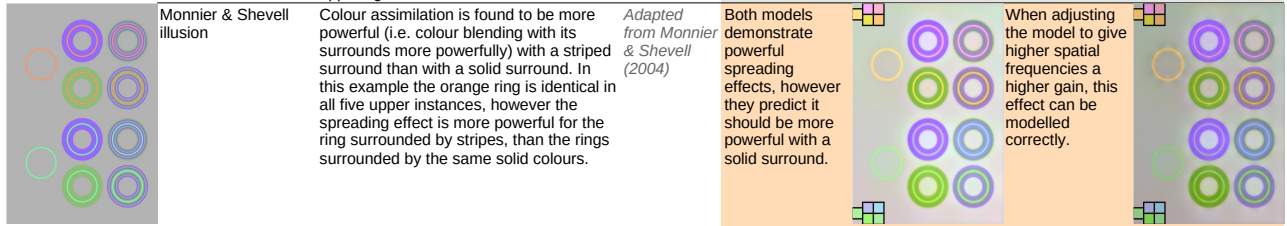

Colour Illusions A number of the brightness illusions above are also powerful in a chromatic context (though not all). Interesting exceptions include illusory spots such as the Hermann grid (which our model suggests requires orientation-sensitive filters).

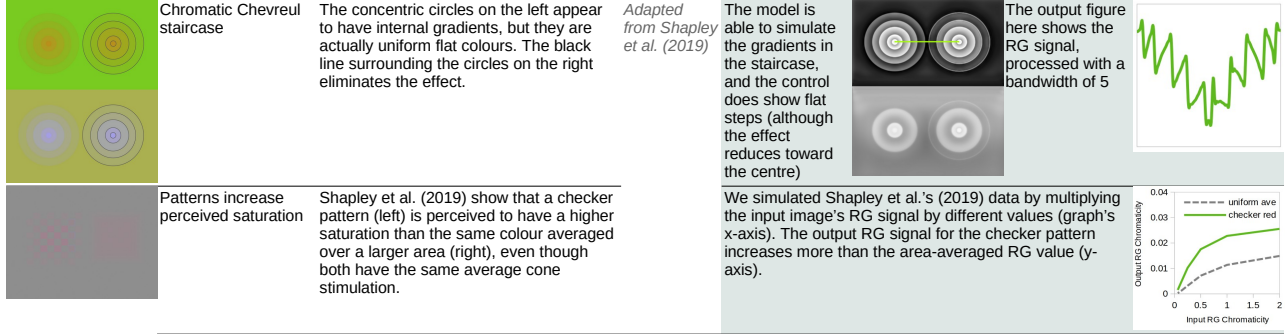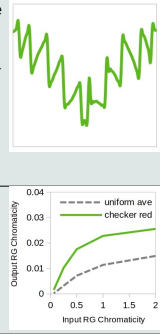

Source: https://www.biorxiv.org/content/10.1101/2022.02.22.481414v1.full.pdf
